# Histone marks are drivers of the splicing changes necessary for an epithelial-to-mesenchymal transition

A. Segelle<sup>1§</sup>, Y. Núñez-Álvarez<sup>1§</sup>, A. J. Oldfield<sup>1</sup>, K. M. Webb<sup>2</sup>, P. Voigt<sup>2</sup>, R. F. Luco<sup>1\*</sup>

## Affiliations

1. Institute of Human Genetics, UMR9002 CNRS-University of Montpellier, 34000, France,

2. Wellcome Centre for Cell Biology, School of Biological Sciences, University of Edinburgh, Edinburgh EH9 3BF, United Kingdom,

§ These authors contributed equally to this work

\* Corresponding author: [reini.luco@igh.cnrs.fr](mailto:reini.luco@igh.cnrs.fr)

## Abstract

Cell differentiation and reprogramming depend on coordinated changes in specific alternative splicing events. How these cell type-specific splicing patterns are dynamically modified in response to a stimulus remains elusive. Taking advantage of the epithelial-to-mesenchymal transition (EMT), a reversible cell reprogramming intimately involved in cancer cell invasiveness and metastasis, we found a strong correlation between changes in the alternative splicing of key exons for EMT, such as at the *Fgfr2* and *Cnntd1* loci, and changes in the enrichment levels of specific histone modifications, namely H3K27ac and H3K27me3. Localised CRISPR epigenome editing of these exon-specific histone marks was sufficient to induce changes in splicing capable of recapitulating important aspects of EMT, such as a motile and invasive cell phenotype. Whereas, impairment of the changes in H3K27 marks observed during EMT, using histone deacetylase inhibitors, repressed inclusion of the mesenchymal isoform despite an EMT induction, supporting a driving effect for H3K27 modifications in establishing the new cell type-specific splicing patterns necessary for EMT cell reprogramming. Finally, H3K27 marks were shown to impact splicing by modulating recruitment of the splicing factor PTB to its RNA binding sites, suggesting a direct link between chromatin modifications and the splicing machinery. Taken together, these results prove the causal role of H3K27 marks in driving the dynamic splicing changes necessary for induction of important aspects of EMT. They also prove that chromatin-mediated splicing changes are sufficient to impact the cell's phenotype, which expands the cell's toolkit to adapt and respond to diverse stimuli, such as EMT induction.

## 35 Introduction

36 During cell reprogramming, such as in the epithelial-to-mesenchymal transition (EMT), cell type-specific  
37 transcriptional and splicing programs are tightly regulated to gain new phenotypic traits<sup>1,2</sup>. Alternative  
38 splicing depends on the combinatorial recruitment of specific splicing factors to their corresponding RNA  
39 binding sites, which impacts the final splicing outcome<sup>3</sup>. It has long been known that nucleosome  
40 positioning and chromatin modifications can modulate this recruitment by impacting RNA polymerase II  
41 elongation rate<sup>4</sup>. More recently, results from our laboratory and others found an alternative mechanism  
42 of chromatin-mediated splicing regulation. Histone marks were shown to modulate the recruitment of  
43 specific splicing factors to weaker RNA-binding sites via protein-protein interactions with chromatin-  
44 binding proteins that act as adaptors between the chromatin and the splicing machinery<sup>5,6</sup>. In this  
45 recruitment model, a histone mark, such as H3K36me3, can impact the recruitment of more than one  
46 splicing regulator, such as PTB, SRSF1 or EFTUD2 (U5 snRNP), via different chromatin adaptor  
47 proteins, like MRG15, PSIP1 or BS69, respectively<sup>7-9</sup>. On the other hand, a splicing factor, such as U2  
48 snRNP, can be recruited by more than one histone mark/chromatin adaptor complex, like  
49 H3K4me3/CHD1<sup>10</sup> and acetyl H3/Gcn5<sup>11</sup>, adding an extra regulatory layer to the alternative splicing  
50 reaction for increased specificity and fine-tuning. At a more global level, recent epigenomic analyses  
51 have uncovered a coordinating role for histone modifications in regulating the alternative splicing of  
52 specific subsets of genes with common regulatory functions<sup>12</sup>. For instance, in acute myeloid leukaemia  
53 cell lines, a subset of alternatively spliced exons intimately involved in cell proliferation and  
54 transformation were shown to be dependent on local enrichment of H3K79me2<sup>13</sup>. Whereas during stem  
55 cell differentiation, exons involved in cell cycle progression and DNA damage response were specifically  
56 marked by H3K36me3 and H3K27ac<sup>14</sup>. However, most of this evidence is just correlative, or based on  
57 genome-wide alteration of the histone mark of interest via drug-based inhibition and/or  
58 overexpression/repression of the chromatin regulator involved, which limits the capacity to properly  
59 assess the direct role of a localized histone mark in driving cell type-specific splicing programs important  
60 for cell identity. Neither do we know how dynamic changes in splicing are rapidly regulated to establish  
61 a novel cell type-specific splicing program in response to a specific stimulus, such as in EMT  
62 reprogramming.

63  
64 Based on our previous results on the alternatively spliced model gene Fibroblast Growth Factor  
65 Receptor 2 (*Fgfr2*)<sup>8,15</sup>, we are now addressing the dynamic role of epigenetic marks in driving the  
66 changes in splicing necessary to impact cell biology. To do so, we took advantage of the well-established  
67 Epithelial-to-Mesenchymal Transition (EMT), in which changes in the alternative splicing of specific  
68 genes, such as *Fgfr2* or *Ctnnd1*, are sufficient to induce cell reprogramming<sup>2,16,17</sup>. Temporal correlations  
69 during EMT identified H3K27me3 and H3K27ac as the two histone marks for which local changes at  
70 alternatively spliced exons essential for EMT preceded the changes in splicing. CRISPR/dCas9

71 epigenome editing of these H3K27 marks, precisely at the alternatively spliced exon of interest, was  
72 sufficient to induce inclusion of the mesenchymal-specific splicing isoform in human epithelial cells. This  
73 was done by regulating the recruitment of the splicing regulator PTB to the pre-mRNA, supporting a  
74 direct effect of H3K27 marks on the splicing machinery. Additionally, inhibition of H3K27ac changes  
75 during EMT impaired inclusion of the mesenchymal-specific splicing event regardless of EMT induction,  
76 proving the dominant effect of these histone marks in establishing the new EMT-specific splicing  
77 program. Finally, epigenetically induced changes in splicing were sufficient to recapitulate important  
78 aspects of the EMT, which supports a major role for histone marks in inducing phenotypically driving  
79 splicing changes. These findings uncover a new regulatory layer through which dynamic changes in  
80 splicing are regulated by chromatin-dependent mechanisms in response to a specific stimulus, such as  
81 in cellular reprogramming.

82

83

## 84 **Results**

85

### 86 **Specific histone modifications correlate in time with dynamic changes in splicing during EMT.**

87 The epithelial-to-mesenchymal transition is a cell reprogramming process involved in early  
88 development, wound healing, and tumour invasion in metastasis<sup>1,2</sup>. Human epithelial MCF10a cells  
89 stably expressing the EMT inducer SNAIL1 fused to the oestrogen receptor (MCF10a-Snail-ER) can be  
90 reprogrammed into mesenchymal-like cells in less than a week by addition of the ER ligand tamoxifen  
91 (Figure 1A)<sup>1</sup>. The first changes in splicing of classical EMT genes, such as *Fgfr2*, *Ctnnd1*, *Slk* and *Scrib*,  
92 were observed as early as 12h after induction (T0.5) (Figure 1C,H and S1F,N,Q). Moreover, all changes  
93 in splicing could be reversed, through a mesenchymal-to-epithelial transition (MET), by removing  
94 tamoxifen from the culture medium for three weeks, highlighting the dynamic nature of this cellular  
95 system (Figure 1C,H and S1F). When comparing changes in alternative splicing of key EMT genes  
96 (*Ctnnd1*, *Enah*, *Fgfr2*, *Slk*, *Scrib* and *Tcf7l2*, Figure 1A) to changes in histone modifications levels  
97 previously shown to mark alternatively spliced genes<sup>8,15</sup>, we found that changes in H3K27me3, H3K27ac  
98 and H3K4me1 strongly correlated in time with splicing changes in 5 out of 6 genes studied (Figure 1B-  
99 K and S1I-R). However, H3K4me1 correlated rather at late phases of EMT (Figure 1F,K, S1I,J,L,M),  
100 and H3K36me3 rarely showed a correlation with changes in splicing (Figure S1D,H and data not shown).  
101 These epigenetic changes were highly localised, occurring precisely over the alternatively spliced exon  
102 (Figure 1D-F,I-K and S1). H3K27me3 and H3K27ac levels were anti-correlated in 3 out of the 5 genes  
103 analysed, while H3K4me1 changed rather in the same direction as H3K27ac, suggesting distinct  
104 combinatorial effects in splicing regulation (Figure 1D-F,I-K and S1I,J). Furthermore, with the exception  
105 of the mutually exclusive exons in *Fgfr2*, H3K27me3 levels positively correlated with inclusion of all the  
106 alternatively spliced exons tested, which points to a regulatory role in coordinating a specific splicing

107 program during EMT (Figure 1D and S1I,J,L,M,P). Of note, these changes in exon-specific histone  
108 marks did not correlate with changes in gene expression nor nucleosome positioning during EMT  
109 (Figure S1A,C,E,G), suggesting a splicing-specific effect. Finally, the observed changes in chromatin  
110 modifications were not only as dynamic as the changes in splicing, but also reversible upon MET,  
111 implying epigenetic plasticity (Figure 1, MET panel).

112

113 In conclusion, we have found a localised enrichment of specific histone marks, H3K27me3, H3K27ac  
114 and H3K4me1, whose changes correlate in time with the highly dynamic splicing changes observed  
115 during the reprogramming of an epithelial cell into a mesenchymal one during EMT, which points to a  
116 potential functional link.

117

118 **Localised changes in H3K27me3 and H3K27ac are sufficient to induce exon-specific changes in**  
119 **alternative splicing.**

120 In contrast with H3K4me1 late changes during EMT, H3K27me3 and H3K27ac changes were evident  
121 prior to the detection of splicing changes in *Ctnnd1* and *Fgfr2* genes, at 6h post-induction (Figure 1,  
122 T0.25 panel), suggesting a causative effect of these marks on alternative splicing. To directly test this  
123 hypothesis, we adapted the CRISPR/dCas9 system<sup>18</sup> to edit the epigenome specifically at differentially  
124 marked, alternatively spliced exons. Catalytic domains of well-known H3K27 modifiers were fused to a  
125 DNA targeting-competent, but nuclease-dead, mutant dCas9 to induce site-specific changes in H3K27  
126 methyl or acetyl levels. Using this system, EZH2 H3K27 methyltransferase<sup>19</sup>, UTX1 demethylase<sup>20</sup>, p300  
127 acetyltransferase<sup>18</sup> and Sid4x deacetylase<sup>21</sup> were targeted to CTNND1 exon 2 or FGFR2 exon IIIc in  
128 untreated epithelial MCF10a-Snail-ER cells (Figure 2A,G). To verify the exon specificity of the system,  
129 alternatively spliced exons present in the same gene, but not differentially enriched for these histone  
130 marks during EMT, namely CTNND1 exon 20 and FGFR2 exon IIIb, were also targeted using the same  
131 dCas9 modifiers (Figure S2C,L). As expected, dCas9-p300, but not its catalytic mutant dCas9-p300\*,  
132 increased H3K27ac levels specifically at the targeted exons in both genes (Figure 2B,H and  
133 S2D,H,M,Q). On the other hand, dCas9-Sid4x slightly reduced H3K27ac levels just at CTNND1 exon 2  
134 and dCas9-UTX1 reduced H3K27me3 levels mostly at exon IIIc, which are the exons enriched in these  
135 marks in epithelial cells (Figure 2B,C,H,I). dCas9-EZH2, though, had only a minor effect on H3K27me3  
136 levels. To improve H3K27me3 editing, we tested vSET, a viral SET domain protein that specifically  
137 methylates H3K27 without requiring Polycomb Repressive Complex 2 subunits for activity (Figure S2A-  
138 B)<sup>22</sup>. As expected, a dimeric vSET construct fused to dCas9 (dCas9-vSETx2), but not its catalytic mutant  
139 dCas9-vSETx2\*, strongly increased H3K27me3 levels precisely at the targeted exons (Figure 2C,I and  
140 S2E,I,N,R). Finally, H3K4me1, H3K9ac and H3K9me2 were not affected by H3K27 epigenome editing,  
141 confirming the specificity of the system (Figure S2U,V). Interestingly, the increase in H3K27ac levels,  
142 mediated by dCas9-p300, also resulted in reduced H3K27me3 levels, while dCas9-UTX1-mediated

143 H3K27 demethylation increased H3K27ac levels and dCas9-vSETx2 reduced H3K27ac (Figure  
144 2B,C,H,I and S2D). These findings confirm the anti-correlative nature of these marks and establish the  
145 capacity of the CRISPR-dCas9 system to generate the chromatin signatures observed during EMT.  
146

147 As predicted from the changes in histone modifications observed during EMT (Figure 1D,E), only dCas9-  
148 EZH2/vSETx2-mediated increase in H3K27me3 levels, or decrease in H3K27ac using dCas9-Sid4x,  
149 affected CTNND1 splicing, resulting in a ~3.5x-fold increase in the inclusion of the mesenchymal-  
150 specific exon 2 (Figure 2D). In contrast, consistent with the exon-specific H3K27 signature observed in  
151 FGFR2 exon IIIc in EMT cells (Figure 1I,J), exon IIIc splicing was induced by an increase in H3K27ac  
152 (dCas9-p300) and by a decrease in H3K27me3 (dCas9-UTX1) levels (Figure 2J). These results proved  
153 the driving effect of these histone marks in inducing specific splicing changes. Importantly, H3K27  
154 epigenome editing did neither affect the total expression levels of these genes, nor splicing of other  
155 exons, such as CTNND1 exon 20 or FGFR2 exon IIIb, supporting an exon-specific splicing effect (Figure  
156 2E,F,K,L). Furthermore, the use of catalytically dead mutants, such as dCas9-vSETx2\* and dCas9-  
157 p300\*, did not impact exon inclusion levels either, which validated an epigenetic-dependent splicing  
158 effect (Figure 2D,J). Finally, targeting CTNND1 exon 2 or FGFR2 exon IIIc with a second set of gRNAs  
159 (g2) also consistently induced inclusion of the mesenchymal-specific isoforms, when the corresponding  
160 dCas9 modifier was used, confirming the robustness of the results and ruling out potential off-target  
161 effects (Figure S2C-G, L-P). It is important to note that epigenome editing of alternatively spliced exons  
162 not differentially marked by H3K27 modifications during EMT, such as CTNND1 exon 20, FGFR2 exon  
163 IIIb or ENAH exon 11 had no impact on their splicing (Figure S2H-K, Q-T and not shown), suggesting a  
164 context-specific regulatory effect at exons marked by H3K27 modifications.  
165

166 Taken together, local changes in specific histone modifications at epigenetically-marked exons are  
167 sufficient to trigger the dynamic changes in alternative splicing observed during EMT, which supports a  
168 causal role for chromatin marks on inducing cell type-specific splicing changes. We next sought to study  
169 the importance of these dynamic epigenetic changes in splicing reprogramming during EMT induction.  
170

### 171 **Dynamic changes in H3K27ac and H3K27me3 are necessary to induce a change in splicing** 172 **during EMT**

173 To test whether the changes in H3K27 marks are necessary to drive the changes in splicing observed  
174 during EMT, MCF10a-Snail-ER cells were treated with a histone pan-deacetylase inhibitor (HDACi)  
175 during EMT induction. As expected, both Trichostatin A (TSA) and the less toxic Panobinostat (Pano)<sup>23</sup>  
176 maintained H3K27ac levels significantly higher than in control cells (DMSO) at the exons of interest  
177 during EMT induction (Figure S3A and not shown). Despite a successful EMT (Figure S3B and not  
178 shown), exons in which there is a depletion in H3K27ac levels and/or increase in H3K27me3 during

179 EMT, which are CTNND1 exon 2, SCRIB exon 16 and to a less extent SLK exon 13, did not shift to the  
180 expected mesenchymal-specific splicing isoform (Figure 3A-C). In contrast, exons with no changes in  
181 H3K27 marks during EMT (ENAH, CLSTN1, PLOD2) were not impacted, or just impacted by one of the  
182 HDAC inhibitors, supporting a specific effect on exons sensitive to H3K27ac (Figure 3D-F). To reduce  
183 pleiotropic indirect effects from the inhibitors (Figure S3C) and narrow down the HDACs necessary for  
184 dynamic changes in splicing, we specifically knocked-down catalytically active HDACs expressed in  
185 MCF10a-Snail-ER cells. Neither HDAC1, HDAC2, HDAC3 nor HDAC8 knockdown had an effect on  
186 *Ctnnd1*, *Scrib* nor *Slk* splicing (data not shown). However, due to known redundancy between HDAC1  
187 and HDAC2<sup>24</sup>, we performed a double knock-down of both deacetylases with lentiviral shRNAs. Even  
188 though HDAC1 could not be repressed to more than 60% (Figure S3D), co-repression of the two HDACs  
189 prior to EMT induction recapitulated HDACi results, without impacting expression of any of the splicing  
190 regulators of relevance for EMT, confirming the driving role of H3K27 marks in inducing specific changes  
191 in alternative splicing (Figure 3G-L and S3F).

192

193 In conclusion, changes in H3K27ac/me3 levels are sufficient and necessary to induce the dynamic  
194 changes in splicing observed during EMT. We next sought to understand how H3K27 marks regulate  
195 splicing using *Ctnnd1* as a model gene.

196

### 197 **H3K27 marks do not regulate splicing by modulating RNA polymerase II elongation rate.**

198 Chromatin has long been proposed to impact splicing by modulating RNA polymerase II elongation rate,  
199 which alters the kinetics of splicing factor recruitment to competing alternative splice sites in nascent  
200 transcripts<sup>5,6</sup>. As H3K27me3 is known to mediate chromatin compaction, which can slow down  
201 transcription kinetics, and H3K27ac displays opposite effects on chromatin and RNA polymerase II  
202 dynamics<sup>4,19</sup>, we compared RNA polymerase II elongation rates at CTNND1 exon 2 before and after  
203 EMT induction in MCF10a-Snail-ER cells. As expected, using the RNA polymerase II inhibitor DRB for  
204 synchronous pause / release of transcription in a cell population, we found a delay in transcription of  
205 CTNND1 exon 2, but not in the constitutively spliced exon 15, in tamoxifen-induced EMT cells (Figure  
206 4B,E). This delay correlated with enrichment of H3K27me3 and RNA polymerase II at exon 2, which is  
207 consistent with a slowdown of RNA polymerase II kinetics (Figure 1D and 4C,F). However, this RNA  
208 polymerase II effect was not observed 12h after induction of EMT (T0.5, Figure 4A,D), even though  
209 changes in H3K27 marks and exon 2 inclusion were already detected at this time point (Figure 1, T0.25  
210 panels), suggesting that early changes in splicing, dependent on H3K27 marks, are unlikely to be  
211 mediated by changes in RNA polymerase II kinetics. Finally, treatment with drugs increasing (TSA) or  
212 decreasing (DRB) RNA polymerase II elongation rate did not have an effect on CTNND1 splicing in  
213 steady-state epithelial nor EMT-induced mesenchymal-like MCF10a-Snail-ER cells (Figure S4A-B),  
214 ruling out an RNA polymerase II-mediated effect.

215

216 We thus conclude that changes in RNA polymerase II elongation rate do not play a role in establishing  
217 the CTNND1 mesenchymal isoform during EMT, but may be a consequence of the new cell type-specific  
218 splicing pattern that could play a role in its maintenance, as a feed-back mechanism to reinforce the  
219 new splice site choice.

220

### 221 **H3K27 marks modulate the recruitment of specific splicing factors to the pre-mRNA.**

222 In parallel to the RNA polymerase II kinetic model, we and others have identified a more direct role for  
223 histone and DNA marks in regulating the recruitment of splicing regulators to the pre-mRNA<sup>8-10,25,26</sup>. To  
224 identify the splicing factors involved, we first tested a panel of regulators potentially involved in CTNND1  
225 exon 2 splicing to determine their possible connection with H3K27 marks. shRNA-mediated knockdown  
226 of all the RNA binding proteins previously implicated in CTNND1 splicing regulation<sup>27-29</sup>, or identified by  
227 motif search analysis, pointed to the splicing factor PTB as the major repressor of CTNND1 exon 2  
228 inclusion (Figure 4G-H and S4C). UV-crosslinking RNA immunoprecipitation assays further revealed  
229 differential recruitment of PTB to exon 2 pre-mRNA during EMT, with preferential binding to the  
230 H3K27ac-marked exon in untreated epithelial MCF10a-Snail-ER cells, when the exon is excluded  
231 (Figure 4I and S4D).

232

233 We next assessed the impact of altering H3K27ac/me3 levels, using the dCas9-vSETx2 construct, on  
234 PTB recruitment to CTNND1 exon 2 in epithelial MCF10a-Snail-ER cells. As predicted, a local increase  
235 in H3K27me3 levels at CTNND1 exon 2, which increases exon inclusion, reduced PTB binding to the  
236 exon pre-mRNA. Whereas PTB binding to control regions, such as CTNND1 exon 6 and exon 20, was  
237 not affected (Figure 4J and S4E). These findings suggest a direct impact of H3K27 marks on PTB  
238 recruitment to CTNND1 exon 2 pre-mRNA.

239

240 Of note, all the exons found to be sensitive to H3K27 marks, namely FGFR2 exon IIIb, SCRIB exon 16,  
241 SLK exon 13 and TCF7L2 exon 4, were also dependent on PTB levels (Figure S4F-H and <sup>8</sup>). Even  
242 more, PTB knock-down recapitulated the splicing phenotype observed when H3K27ac levels are low  
243 and/or H3K27me3 levels are high, supporting a direct effect of H3K27 marks on PTB recruitment (Figure  
244 1, S1 and 4). Genome-wide studies will assess the global impact of H3K27ac and H3K27me3 in  
245 coordinating a PTB-dependent splicing program, known to play a major role in EMT and cancer<sup>2</sup>.

246

247 We conclude that in the genes studied, dynamic changes in H3K27 marks directly impact alternative  
248 splicing by modulating PTB recruitment to the pre-mRNA.

249

### 250 **Chromatin-induced changes in splicing recapitulate the EMT.**

251 The physiological impact of chromatin-mediated changes in splicing has long been controversial.  
252 Changes in CTNND1 and FGFR2 alternative splicing are important regulators of EMT, and their  
253 mesenchymal-specific isoforms have been associated with poor prognosis in several carcinomas,  
254 including breast and prostate cancers<sup>2,30-32</sup>. An increase in CTNND1 exon 2 inclusion levels affects the  
255 capacity of the protein to interact with E-cadherins, destabilizing cell-cell interactions and increasing cell  
256 motility and invasiveness<sup>17</sup>. Alternatively, an H3K36me3-mediated decrease of FGFR2 exon IIIc  
257 mesenchymal isoform, which impacts the ligand specificity of the receptor, was shown to significantly  
258 decrease the migratory and invasive phenotype of non-small lung cancer cells, without impacting  
259 proliferation or apoptosis<sup>33</sup>. We thus tested whether H3K27-mediated epigenetic induction of the  
260 mesenchymal-specific isoforms of CTNND1 or FGFR2 would be sufficient to reproduce migratory EMT-  
261 like phenotypes in epithelial MCF10-Snail-ER cells.

262  
263 dCas9-Sid4x- or dCas9-vSETx2-mediated increase in CTNND1.ex2 mesenchymal isoform and dCas9-  
264 p300- or dCas9-UTX1-mediated increase in FGFR2.IIIc mesenchymal isoform significantly decreased  
265 the expression of classical epithelial markers, such as E-cadherin and EPCAM, while increasing the  
266 expression of the mesenchymal markers ECM-1 and MCAM by ~2-fold, both at the transcript and protein  
267 level (Figure 5A-D). This was specific to the epigenetic editors impacting splicing since none of the other  
268 dCas9 modifiers nor dCas9 mutants had an effect (Figure 5A-D and not shown). Furthermore, the  
269 H3K27me3-mediated shift in CTNND1 splicing significantly increased the non-directional (wound-  
270 healing) and bi-directional (transwell assay) migration capacity of targeted MCF10a-Snail-ER cells  
271 (Figure 5E-F), whereas catalytically dead dCas9-p300\* and dCas9-vSETx2\* had no effect (Figure 5A-  
272 F). None of the splicing regulators known to play a role in EMT changed expression levels upon CRISPR  
273 epigenome editing (Figure S5A), supporting a direct chromatin-mediated effect on the EMT phenotype.  
274 We conclude that highly localised changes in H3K27 marks at alternatively spliced exons important for  
275 EMT are sufficient to induce a partial cell reprogramming.

276  
277 CRISPR-dCas9 editing systems are known to be heterogenous, with just a percentage of cells properly  
278 targeted at the gene locus of interest. To assess the real biological impact of chromatin-induced changes  
279 in CTNND1 splicing, we sorted cells in which the mesenchymal-specific protein variant was present,  
280 using a splicing-specific antibody recognising only the CTNND1 protein isoform including exon 2  
281 (mCTNND1(ex2)). dCas9-vSETx2-mediated, and thus H3K27me3-driven, induction of exon 2 inclusion  
282 in epithelial MCF10a-Snail-ER cells increased the proportion of cells expressing the CTNND1  
283 mesenchymal isoform almost as much as tamoxifen-induced EMT (31% vs 43% positive cells,  
284 respectively), whereas the use of the dCas9-vSETx2\* mutant had no effect (9% of positive cells as in  
285 epithelial cells) (Figure 5G). Moreover, mCTNND1(ex2)-positive cells from dCas9-vSETx2-infected  
286 cells, but not dCas9-vSETx2\*, included exon 2 at similar levels to tamoxifen-induced EMT cells (Figure



287 S5C), supporting a complete splicing switch to the mesenchymal phenotype only when inducing  
288 changes in H3K27 marks. In concordance, EMT was now completely recapitulated, with changes in bi-  
289 directional migration, invasion and expression of EMT markers similar to the ones observed in  
290 tamoxifen-induced cells (Figure 5H-L). To rule out indirect off-target effects, an independent combination  
291 of gRNAs (g2) targeting exon 2 had comparable effects (Figure S5B-G), reinforcing a direct role for  
292 chromatin-induced splicing changes in driving important aspects of EMT cell reprogramming.

293

294 Collectively, these results support a model by which local changes in exon-specific H3K27 modifications  
295 are responsible for the dynamic changes in alternative splicing necessary for cell reprogramming.  
296 Moreover, these chromatin-induced changes in splicing are sufficient to induce a change in cell  
297 phenotype, providing a novel toolkit for the cell to modulate its proteome in a dynamic and reversible  
298 way.

299

300

## 301 Discussion

302 Cell type-specific chromatin and alternative splicing patterns have been intimately involved in cell  
303 differentiation and lineage commitment<sup>19,34</sup>. Increasing evidence has shown a functional cross-talk  
304 between these two regulatory layers, whose dysregulation can lead to disease<sup>3,5,14,33</sup>. However, it has  
305 remained unclear to what extent chromatin modifications can directly cause cell fate-switching splicing  
306 changes. Using CRISPR/dCas9 epigenome editing tools<sup>18</sup>, we have successfully altered local  
307 H3K27me3 or H3K27ac levels at alternatively spliced loci. This exon-specific chromatin editing directly  
308 affected recognition of these exons by the splicing machinery without affecting overall transcription  
309 levels nor RNA Polymerase II kinetics. As we targeted exons essential for the reprogramming of  
310 epithelial into mesenchymal cells (EMT), such as CTNND1 exon 2 and FGFR2 exon IIIc, we could show  
311 that H3K27-mediated switches in alternative splicing of key EMT exons are sufficient to induce important  
312 features of cell reprogramming, demonstrating that chromatin can also regulate cellular identity by  
313 driving key changes in alternative splicing patterns.

314

315 Changes in splicing-associated histone marks were very dynamic, starting as early as 6h after induction  
316 of EMT, even before changes in splicing could be detected. They were also completely reversible,  
317 suggesting that epigenetic plasticity could be responsible for the splicing machinery's dynamic response  
318 to a new stimulus, like in EMT. In fact, plants and flies already exploit these chromatin and splicing  
319 mediated mechanisms to respond to changes in light and temperature<sup>35-37</sup>. Mammalian cells likely take  
320 advantage of the same systems by epigenetically regulating key splicing events for a more efficient and  
321 rapid response to external stimuli.

322

323 Surprisingly, not all histone marks showed the same dynamics during EMT. For instance, H3K4me1  
324 only correlated with late changes in splicing, similarly to RNA polymerase II elongation rate. Since  
325 H3K4me1 levels have been positively associated with RNA polymerase II kinetics<sup>38</sup>, we propose that,  
326 contrary to H3K27 marks, H3K4me1 changes could be a consequence of altered splicing, setting up a  
327 regulatory feedback loop to reinforce or maintain novel splicing patterns by impacting RNA polymerase  
328 II elongation rates.

329  
330 Chromatin is known to impact splicing by modulating the recruitment of the splicing machinery to weaker  
331 RNA binding sites. Several direct physical interactions between splicing and chromatin regulators have  
332 been reported. For instance H3K36me3 and H3K9me3 can regulate PTB and SRSF3-dependent  
333 splicing via recruitment of the chromatin adaptor proteins MRG15 and HP1, respectively, which by  
334 physical interaction favour the binding of the splicing regulators to the pre-mRNA during co-  
335 transcriptional splicing<sup>8,25</sup>. Splicing factors can also interact with the chromatin modifiers, such as  
336 hnRNPK with the H3K9 methyltransferase SETDB1 or RBFOX2 with the H3K27 methyltransferase  
337 Polycomb Repressor Complex 2<sup>39,40</sup>. Finally hnRNPA2B1 and hnRNPL were shown to directly interact  
338 with chromatin in an RNA-independent way<sup>41</sup>, suggesting that chromatin counts with a variety of  
339 molecular mechanisms to impact splicing factors recruitment to the pre-mRNA. Interestingly, histone  
340 mark writers, such as p300, have recently been shown to modulate alternative splicing by post-  
341 translationally acetylating the splicing factors themselves, which can impact their RNA binding capacity  
342 and activity<sup>21</sup>. There is evidence of a p300-mediated acetylation of PTB<sup>42</sup>. However, its functional impact,  
343 as well as existence of other post-translational modifications, such as methylation, remain unclear. Since  
344 in our particular model system, both acetylation (dCas9-p300, dCas9-Sid4x) and methylation (dCas9-  
345 UTX1, dCas9-vSETx2) can affect the same alternatively spliced genes, we consider it unlikely that a  
346 splicing factor can be post-translationally regulated by the two marks.

347  
348 Of note, we do not expect exons marked by a specific histone mark to be dependent on the same  
349 splicing regulator, nor all the exons dependent on a specific splicing regulator to be dependent on the  
350 same histone mark. In fact, H3K36me3 has been previously shown to modulate recruitment of the  
351 splicing repressor PTB and the enhancer SRSF1 at different subsets of alternatively spliced exons<sup>8,9</sup>.  
352 U2 snRNP core splicing regulators can be modulated by H3K4me3 and acetyl H3 marks<sup>10,11</sup>. Histone  
353 acetyltransferases (HATs) and deacetylases (HDACs) have also been shown to differently impact  
354 splicing by a variety of mechanisms, from modulating RNA polymerase II elongation rates to directly  
355 interacting with splicing regulators such as SF3A1 and SMN1<sup>4,21,43</sup>. Finally, of relevance for this work,  
356 the aforementioned splicing factor RBFOX2 has recently been shown to induce recruitment of Polycomb  
357 Repressive Complex 2 to bivalent gene promoters by protein-protein interactions<sup>40</sup>. Since RBFOX2 and  
358 PTB are major splicing regulators of EMT<sup>2</sup>, H3K27me3 enrichment at RBFOX2-dependent exons and

359 H3K27ac enrichment at PTB-dependent sites could represent complementary mechanisms of  
360 regulating key splicing events during EMT. In such complex context, confounding proteomics  
361 approaches identifying all the protein interactors of a specific histone mark prevalent in the genome,  
362 such as H3K27ac, can be limiting to identify novel chromatin/splicing effectors. The development of  
363 exon-specific proteomics approaches arises as a promising solution for such mechanistic caveats.

364

365 Finally, we expect this chromatin-mediated regulation of alternative splicing to be gene- and context-  
366 specific. Recent published genome-wide analysis, in the most extensive epigenomic and transcriptomic  
367 datasets publicly available from the ENCODE and Epigenomic Roadmap projects, showed that exons  
368 differentially marked by specific histone marks share common functional and regulatory pathways,  
369 suggesting a coordinating role for histone marks in regulating the alternative splicing of functionally  
370 related exons<sup>12</sup>. In the case of H3K27ac and H3K27me<sub>3</sub>, we identified 5 genes, intimately involved in  
371 cell migration and invasion<sup>17,33,44,45</sup>, which alternative splicing depends on H3K27 marks. Genome-wide  
372 studies will be necessary to properly address the global impact of these histone marks in splicing  
373 regulation, and to determine what characterizes H3K27-marked exons. Once a list of H3K27ac/me<sub>3</sub>-  
374 dependent exons is identified, we will be better positioned to understand how these histone  
375 modifications are regulated during EMT and their impact on cell reprogramming.

376

377 In conclusion, we propose that exons sensitive to H3K27 marks might be coregulated during EMT for a  
378 rapid induction of changes in splicing necessary for the dynamic functional changes observed during  
379 cellular reprogramming. This could have an impact on the development of more specific therapeutic  
380 targets to reduce cell invasion and tumour metastasis that depends on EMT phenomena. Therapies  
381 targeting general chromatin and splicing factors are currently in use, but often associated with pleiotropic  
382 and indirect effects<sup>3,46</sup>. We propose to use epigenome editing tools to selectively change the splicing-  
383 associated chromatin marks responsible for pro-tumorigenic splicing isoforms, such as mCTNND1(ex2).  
384 In addition to the H3K27-centric regulation of EMT-related alternative splicing identified here, other  
385 histone marks might also coordinate the regulation of alternative splicing events important for other  
386 physiological processes. Future studies will bring the necessary insights into this highly dynamic layer  
387 of regulation.

388

389

## 390 **Materials and Methods**

391

### 392 **Cell Lines and Cell Culture**

393 **MCF10a cells:** Mcf10a cells are non-transformed human female breast epithelial cells. Mcf10a-Snail-  
394 ER cell line was generated by introducing a Snail-1 retroviral expression construct using a fused

395 estrogen receptor (ER) response element to mediate regulation by exogenous 4-hydroxy-tamoxifen (4-  
396 OHT) and was obtained from Daniel A. Haber lab with its parental cell line <sup>1</sup>. All Mcf10a cell lines were  
397 maintained at 37°C with 5% CO<sub>2</sub> in DMEM/F12 supplemented with 5% horse serum, 10 ng/mL EGF,  
398 10 µg/mL insulin, 0.1 µg/mL cholera toxin, 0.5 µg/mL hydrocortisone, 1% penicillin/streptomycin, 1% L-  
399 glutamine (complete medium).

400  
401 **EMT induction:** Mcf10a were seeded at 7.5.10<sup>5</sup> cells / 150mm dish and 24h after cells were  
402 synchronized in DMEM/F12 supplemented with 10 ng/mL EGF, 10 µg/mL insulin, 0.1 µg/mL cholera  
403 toxin, 0.5 µg/mL hydrocortisone, 1% w/v penicillin/streptomycin (No serum medium) for 15h. Cells were  
404 then treated with 100nM 4-OHT or Methanol (control) in complete medium.

405  
406 **HEK293T cells:** HEK293T were maintained at 37°C with 5% CO<sub>2</sub> in DMEM supplemented with 10%  
407 fetal bovine serum, 1% P/S, 1% L-glutamine. HEK293T are transfected by Calcium Phosphate  
408 transfection to generate recombinant lentiviruses.

#### 409 410 **Cloning and Plasmids**

411 To generate plasmid DNAs encoding GFP/HAtag epitope-tagged sid4x (a gift from Salton lab), p300core  
412 (addgene 61357), EZH2core (a gift from Duckett lab), vSETx2 (from Voigt lab) and UTX core (a gift from  
413 Ge lab), the cDNAs were amplified using Q5 High-Fidelity DNA Polymerase (NEB) with primers carrying  
414 the appropriate restriction enzymes sites *Ascl*/*Sbfl* (See Table S6 for the list of primers used) and cloned  
415 using Quick DNA Ligation Kit (NEB) into dCas9-empty-GFP vector. dCas9-empty-GFP vector has been  
416 generated by cutting dCas9-VP64-GFP plasmid (addgene 61422) by *Bam*HI and *Nhe*I restriction  
417 enzymes to remove VP64 sequence, followed by introduction of a linker containing *Ascl* and *Sbfl*  
418 restriction sites and a HAtag epitope-tagged. Q5 Site-Directed Mutagenesis Kit (NEB) was used for  
419 generating dCas9 plasmids encoding the mutant p300core\* (Y1467F) and vSETx2\* (Y105F x2)  
420 proteins. Mutagenesis primer sequences and plasmids used in this study are listed in the Table S6. To  
421 generate pKLV2.3-Hygro gRNA lentiviral plasmid, the commercial pKLV2.2-PGKpuroBFP plasmid  
422 (addgene 72666) was modified by removing the puromycin resistance and the BFP tag, an *Eco*RI site  
423 was added and hygromycin resistance was introduced in *Xho*I/*Eco*RI restriction sites. The different  
424 gRNAs were cloned by using *Sap*I or *Bbs*I restriction sites. Cloning primer sequences and gRNAs used  
425 in this study are listed in the Table S6. Sh RNA plasmids were gifts from different laboratories (See Key  
426 Resources Table) or obtained by cloning Sh RNA sequences into pLKO.1-Hygro (addgene 24150) or  
427 pLKO.1-Blast (addgene 26655) plasmids with *Age*I/*Eco*RI restriction sites. Sh RNA sequences used in  
428 this study are listed in the Table S5.

#### 429 430 **Expression and Purification of vSET constructs**

431 The coding sequence for vSET was ordered from IDT and cloned into a modified pET22b plasmid.  
432 Single-chain dimeric vSET constructs with GSGSG-(SSG)<sub>n</sub>-SGSGG linkers (n=1–3) in between two  
433 vSET monomers were generated by PCR and subcloning of a fragment encoding the C-terminal 8  
434 residues of vSET followed by the linker and a complete vSET monomer into the XbaI and HindIII  
435 restriction sites of vSET in modified pET22b.  
436 vSET and dimeric sc-vSET (called vSETx2 in this paper) constructs were expressed in BL21 *E. coli* and  
437 purified from inclusion bodies essentially as described for vSET by <sup>47</sup>. In short, inclusion bodies were  
438 solubilized in unfolding buffer (20 mM Tris pH 7.5, 7 M guanidine hydrochloride, 10 mM DTT). To refold  
439 vSET and vSETx2 proteins, solubilized protein was first dialyzed against urea dialysis buffer (10 mM  
440 Tris pH 7.5, 7 M urea, 100 mM NaCl, 1 mM EDTA, 5 mM β-mercaptoethanol), followed by repeated  
441 dilution with vSET refolding buffer (50 mM Tris pH 7.5, 300 mM NaCl, 10% glycerol, 0.1 mM EDTA,  
442 5 mM β-mercaptoethanol) reducing the concentration of urea from 7 M to 1 M in a step-wise fashion in  
443 increments of 1 M (1 h/dialysis step). Finally, refolded vSET and vSETx2 proteins were dialyzed once  
444 against vSET refolding buffer and then once against vSET HEPES refolding buffer (50 mM HEPES  
445 pH 7.5, 300 mM NaCl, 5% glycerol, 0.1 mM EDTA, 5 mM β-mercaptoethanol).  
446 Size exclusion chromatography of refolded vSET and vSETx2 constructs was performed on a Superdex  
447 75 column in vSET HEPES refolding buffer.  
448 vSETx2 construct specificity towards H3K27 was tested by methyltransferase assays in which the  
449 substrate nucleosomes were harbouring an H3K27A mutation (Figure S2C).

450

#### 451 **Methyltransferase assays**

452 In vitro histone methyltransferase (HMT) assays were carried out essentially as described in <sup>48</sup>. Briefly,  
453 core histones were expressed in *E. coli*, purified from inclusion bodies and assembled into histone  
454 octamers by dialysis into refolding buffer (10 mM Tris pH 8, 2 M NaCl, 1 mM EDTA, 5 mM β-  
455 mercaptoethanol). Correctly assembled octamers were purified by size exclusion chromatography on a  
456 Superdex S200 column. Recombinant nucleosome arrays were reconstituted via salt dialysis assembly  
457 of histone octamers onto plasmid DNA containing 12 177-bp repeats of the 601 nucleosome positioning  
458 sequence. To determine methylation activity, 2–10 ng of vSET or vSETx2 constructs were incubated  
459 with 1 μg of recombinant nucleosome arrays in 50 mM Tris pH 8.5, 5 mM MgCl<sub>2</sub>, 4 mM DTT, and <sup>3</sup>H-  
460 labeled SAM for 1 h at 30°C. Reactions were stopped by addition of SDS loading buffer. After separation  
461 by SDS-PAGE and transfer to PVDF membranes, loading was assessed by Coomassie staining. Activity  
462 was detected as incorporation of <sup>3</sup>H via exposure of Biomax MS film with the help of Biomax Transcreen  
463 LE (both Kodak Carestream) intensifying screens.

464

#### 465 **Epigenome Editing**

466 Stable cell lines of MCF10a-Snail-ER expressing the different dCas9s were generated. Briefly, cells  
467 were infected with recombinant viruses containing dCas9-empty-GFP, dCas9-sid4x-GFP, dCas9-  
468 p300core-GFP, dCas9-EZH2core-GFP, dCas9-vSETx2-GFP or dCas9-UTXcore-GFP following  
469 Recombinant Lentivirus Production protocol. Infected cells were harvested and GFP-sorted using a BD  
470 FACS Melody (BD Biosciences-US). GFP was excited by a 488-nm laser line and its emission was  
471 collected through 527/32BD. dCas9 Stable cell lines were then infected with Lentiviruses containing  
472 pKLV2.3-Hygro + gRNAs, were split and medium was supplemented with 100 $\mu$ g/mL hygromycin. See  
473 Table S4 for the list of gRNAs used.

474

#### 475 **Recombinant Lentivirus Production**

476 HEK393T were split at 2.10<sup>6</sup> cells / 100mm dish (Day 1). Cells were transfected with 1 $\mu$ g psPAX2  
477 plasmid (VSVG env gene), 1 $\mu$ g pMD2.G plasmid (gag, pol, and accessory proteins), 5 $\mu$ g of plasmid of  
478 interest (eg. dCas9-empty), 250mM CaCl<sub>2</sub>, qsp 500 $\mu$ L sterile water. Samples were gently mixed and  
479 completed with 2X HEPES Buffered Saline (HBS), Incubated 15min at room temperature. Mixes were  
480 dropped on HEK293T and cells were maintained at 37°C with 5% CO<sub>2</sub> (Day 2). 15h after transfection  
481 medium was replaced by MCF10a complete medium and MCF10a cells were split at 5.10<sup>5</sup> cells/100mm  
482 dish for further infections (Day 3). 48h and 72h after transfection, viruses were collected, filtered through  
483 0.45 $\mu$ m filter, and dropped on MCF10a cells (Days 4 and 5). 72h after, cells were split and medium was  
484 supplemented with 15 $\mu$ g/mL blasticidin or 100 $\mu$ g/mL hygromycin.

485

#### 486 **Chromatin Immunoprecipitation**

487 We performed CHIP using H3K27me3 antibody (Cell Signaling C36B11), H3K27Ac antibody (abcam  
488 4729), H3K4me1 antibody (abcam 8895), H3K9Ac antibody (abcam 4441), H3K9me2 antibody (abcam  
489 1220), H3 antibody (Diagenode C15200011), HAtag antibody (abcam 9110), total Pol-II antibody (Santa  
490 Cruz sc-55492). MCF10a cells (10 million per sample) were fixed in 1% formaldehyde in PBS at room  
491 temperature with agitation for 2min (Histone marks), 4min (HAtag), 10min (Total Pol-II), then quenched  
492 with 1M glycine for 5 min. Fixed cells were resuspended in 1mL cold Lysis Buffer A (50mM HEPES pH  
493 7.5, 140mM NaCl, 1mM EDTA, 10% glycerol, 0.5% NP-40/Igepal, 0.25% Triton X-100) prepared fresh  
494 with protease inhibitors (Sigma 11836145001) and incubated at 4°C on rotating wheel for 10 min. Nuclei  
495 were pelleted and resuspended in 1mL Lysis Buffer B (10mM Tris-HCl pH 8, 200mM NaCl, 1mM EDTA,  
496 0.5mM EGTA, prepared fresh with protease inhibitors), and incubated on rotating wheel for 10 min.  
497 Samples were then diluted with 0.75mL Dilution Buffer C (10mM Tris-HCl pH 8, 100mM NaCl, 1mM  
498 EDTA, 0.5mM EGTA, 0.1% sodium deoxycholate, 0.5% N-lauroylsarcosine, prepared fresh with  
499 protease inhibitors), and sonicated at 4°C for 12, 14, 16 min (for 2, 4, 10 min cross-linking respectively)  
500 to generate fragments from 200bp to 1kp long. After sonication, samples were spun at 20,000xg for  
501 30min at 4°C to remove debris. 8 $\mu$ g (Histone marks, HAtag) or 25 $\mu$ g (Total Pol-II) of chromatin were

502 diluted in TSE 150 Buffer (0.1% SDS, 1% Triton X-100, 2mM EDTA, 20mM Tris-HCl pH 8, 150mM NaCl,  
503 supplemented with protease inhibitors) and cleaned-up with 30 $\mu$ L of pre-washed Dynabeads Protein G  
504 (Thermo Fisher 10009D) and incubated at 4°C on rotating wheel for 1h30. Prior to setting up  
505 immunoprecipitation (“IP”) reactions, 50 $\mu$ L of precleared chromatin was removed as “Input.” 150 $\mu$ L of  
506 TE/1% SDS Buffer (10mM Tris-HCl pH 8, 1mM EDTA pH 8, 1% SDS) was added to “Input” and  
507 incubated overnight at 65°C. 3 $\mu$ L of proteinase K (Thermo Fisher EO0491) was added and samples were  
508 incubated at 37°C for 2h. Following the incubation, “Input” DNA was purified using the QIAquick PCR  
509 Purification kit (QIAGEN 28106) per the manufacturer’s instructions. To set up IP reactions, precleared  
510 chromatin was mixed with antibody and rotated overnight at 4°C. IP reactions was added to 30 $\mu$ L pre-  
511 washed Dynabeads Protein G and rotated 1h30 at 4°C. Beads were washed once with TSE 150 Buffer,  
512 once with TSE 500 Buffer (0.1% SDS, 1% Triton X-100, 2mM EDTA, 20mM Tris-HCl pH 8, 500mM  
513 NaCl), once with Washing Buffer (10 mM Tris-HCl pH 8, 1mM EDTA, 0.25 M LiCl, 0.5% NP-40/Igepal,  
514 0.5% sodium deoxycholate), and twice with TE (10mM Tris-HCl pH 8, 1mM EDTA pH 8). Following the  
515 final wash, beads were eluted with 100 $\mu$ L of Elution Buffer (50mM Tris-HCl pH 8, 10mM EDTA, 1% SDS)  
516 15min at 65°C while vigorously shaking, and 100 $\mu$ L of TE/1% SDS Buffer for a final eluate volume of  
517 200 $\mu$ L. The following were incubated overnight at 65°C. 3 $\mu$ L of proteinase K was added and samples  
518 were incubated at 37°C for 2h. Following the incubation, DNA was purified using the QIAquick PCR  
519 Purification kit (QIAGEN 28106) per the manufacturer’s instructions. Input and immunoprecipitated DNA  
520 were then analyzed by QPCR using the iTaq Universal Syber Green supermix (Bio-Rad #1725121) on  
521 the Bio-Rad CFX-96 Touch Real-Time PCR System. Results are represented as the mean value +/-  
522 S.E.M of at least 3 independent experiments of immunoprecipitated chromatin (calculated as a  
523 percentage of the input) with the indicated antibodies after normalization by the mean of two control  
524 regions stably enriched across the different conditions. See Table S1 for the list of gene-specific primers  
525 used.

526

### 527 **RNA Extraction and RT-qPCR**

528 Quantitative RT-PCR analysis was performed in biological triplicates or quadruplicates. Total RNAs  
529 were prepared from cells with the GeneJET RNA Purification Kit (Thermo Scientific #K0732). All  
530 samples were eluted into 30 $\mu$ L RNase-free water. DNAs was remove from RNA by using RQ1 RNase-  
531 Free DNase (Promega #M6101), briefly, 1 $\mu$ g of RNA was mixed with RQ1 DNase and RQ1 DNase 10X  
532 Reaction Buffer and incubated 30min at 37°C. RQ1 enzyme was inactivated by adding Stop Solution  
533 10min at 65°C. cDNAs were generated using the Transcriptor First Strand cDNA Synthesis kit (Roche  
534 04 897 030 001) according to the manufacturer’s instructions. For each biological replicate, quantitative  
535 PCR reactions were performed in technical duplicates using the iTaq Universal Syber Green supermix  
536 (Bio-Rad) on the Bio-Rad CFX-96 Touch Real-Time PCR System, and the data normalized to *TBP*.

537 Data from biological replicates are plotted as mean  $\pm$  S.E.M. See Table S2 for the list of gene-specific  
538 primers used.

539

#### 540 **Migration and Invasion Assays**

541 **Nondirectional migration - Wound Healing Assay:** MCF10a cells were plated at  $1.10^6$  cells/well in 6  
542 well plates containing complete medium and they were grown to confluency. Confluent cultures were  
543 serum-starved for 12 hours. Serum-starved, confluent cell monolayers were wounded with a plastic  
544 pipette tip and they were washed three times with PBS to remove floating cells. Following washing, the  
545 cells were cultured in complete medium. The wounded area was photographed at 0h (control) and 24  
546 hours later using a Zeiss axiovert 40 CFL microscope with a 10X objective (100X magnification). Cell  
547 migration into the scratch was quantified using ImageJ plugin MRI Wound Healing Tool (Volker Baecker,  
548 Montpellier RIO Imaging).

549

550 **Directional migration – Transwell Filter Assay:** Cell migration assay was performed using 24 well  
551 chambers (Sigma CLS3422-48EA) with uncoated polycarbonate membranes (pore size  $8\mu\text{m}$ ). Briefly,  
552  $5.10^4$  cells resuspended in depleted medium (DMEM/F12 supplemented with 1% horse serum,  
553  $10\mu\text{g/mL}$  insulin,  $0.1\mu\text{g/mL}$  cholera toxin,  $0.5\mu\text{g/mL}$  hydrocortisone, 1% penicillin/streptomycin, 1% L-  
554 glutamine) were placed in the upper chamber of the transwell unit. The bottom chamber was filled with  
555  $0.6\text{mL}$  complete medium supplemented with  $20\text{ng/mL}$  FGF-2. The plates were incubated for 12h at  $37^\circ\text{C}$   
556 with 5%  $\text{CO}_2$  and the cells migrating from the upper to the lower chamber of the unit were fixed with 4%  
557 paraformaldehyde in PBS 2min, permeabilized with 0.1% Triton X-100 for 5min and stained with 0.2%  
558 crystal violet for 1h. Migrating cells were counted using a Zeiss axiovert 40 CFL microscope with a 5X  
559 objective (50X magnification).

560

561 **Invasion – Transwell Filter Assay:** For cell invasion assay, 24 well chambers were coated with  
562 Matrigel (Sigma E6909) diluted in depleted medium for 1h at  $37^\circ\text{C}$  and assays were performed as  
563 described in Directional migration except the assay was performed for 24h.

564

#### 565 **Flow Cytometry Experiments**

566 MCF10a cells were fixed in 4% Paraformaldehyde for 10min at room temperature followed by a 15min  
567 permeabilization step in 0.5% Tween20. Cells were resuspended in Blocking Buffer (PBS, 3% BSA,  
568 0.1% Tween20) for 30min on rotating wheel at room temperature and incubated with conjugated  
569 antibodies EPCAM-PE (MACS Miltenyi 130-113-264) and MCAM-APC (MACS Miltenyi 130-120-771)  
570 for 1h30 on rotating wheel at room temperature protected from light. Cells were harvested and analyzed  
571 using a MACS Quant 10 (MACS Miltenyi Biotec). PE was excited by a 488-nm laser line (laser DPSS)  
572 and its emission was collected through 655/605nm; APC was excited by a 640-nm laser line and its



573 emission was collected through 655/730nm. The data were analyzed using Flowing software (Perttu  
574 Terho, Turku Centre for Biotechnology).

575

### 576 **FACS of CTNND1 Exon 2 Expressing Cells**

577 Cells were resuspended in Blocking Buffer (PBS, 3% BSA) for 30min on rotating wheel at room  
578 temperature and successively incubated with CTNND1 e2 primary antibody (Santa Cruz sc-23873) for  
579 1h30 on rotating wheel at room temperature, and PE-Cy7 secondary antibody (Thermo Fisher 25-4015-  
580 82) for 30min on rotating wheel at room temperature protected from light. Cells were harvested and  
581 analyzed using a BD FACS Melody (BD Biosciences-US). PE-Cy7 was excited by a 561-nm laser line  
582 and its emission was collected through 783/56BD. The data were analyzed using BD FACS Chorus  
583 software (BD Biosciences-US).

584

### 585 **Polymerase II Elongation Measurement**

586 A DRB treatment (Sigma D1916) of 100 $\mu$ M for 6h was necessary in order to fully block endogenous  
587 CFTR transcription. Cells were washed and the kinetic (0, 5, 10, 15, 20, 30, 45, 60, 90 min) was started  
588 by adding complete medium. For each time point of the kinetic, cells are scraped and cell pellets are  
589 snap frozen in liquid nitrogen. Total RNA was extracted as mentioned above in RNA Extraction and RT-  
590 qPCR. Reverse transcriptase reaction was initiated with random hexamers. Quantification of the pre-  
591 mRNAs was performed by real-time PCR with amplicons spanning the intron-exon junctions. For each  
592 biological replicate, quantitative PCR reactions were performed in technical duplicates using the iTaq  
593 Universal Syber Green supermix (Bio-Rad) on the Bio-Rad CFX-96 Touch Real-Time PCR System, and  
594 the data normalized by *tRNA*. Data from biological replicates are plotted as mean  $\pm$  S.E.M. See Table  
595 S3 for the list of gene-specific primers used.

596

### 597 **TSA, Panobinostat and DRB Treatments**

598 A 24 hours treatment of 40 $\mu$ M of DRB (Sigma D1916) or 1 $\mu$ g/mL of TSA (Trichostatin A – Sigma T8552)  
599 was applied on MCF10a-Snail-ER cells after 0 days (T0) or 7 days (T7) of EMT induction, to impede the  
600 dynamics of transcribing RNA Polymerase II. Total RNA extraction and quantification were performed  
601 as mentioned above in Polymerase II Elongation measurement.

602 For HDAC inhibition during EMT reprogramming, MCF10a-Snail-ER cells were treated with 3 $\mu$ g/mL of  
603 TSA (Trichostatin A – Sigma T8552) or 10nM of Panobinostat (gift from Moreaux Lab, IGH) at the same  
604 time as addition of Tamoxifen for EMT induction during 24h.

605

### 606 **shRNA Knockdown**

607 Knock-down of HDAC1, HDAC2, PTB, ELAV1, ESRP1, MBNL1, hnRNPFH1, CELF1, hnRNPF, SRSF1,  
608 FUS, RBFOX2, SOX9, SMAD3 and PCBP1 was performed according to the Recombinant Lentivirus

609 Production protocol. Briefly, HEK293T cells were transfected with the appropriate shRNA plasmid, 15h  
610 after transfection medium was replaced by MCF10a complete medium and MCF10a cells were split for  
611 further infections. 48h and 72h after transfection, viruses were collected, filtered through 0.45 $\mu$ m filter,  
612 and dropped on MCF10a cells. 72h after, cells were split and medium was supplemented with 15 $\mu$ g/mL  
613 blasticidin or 100 $\mu$ g/mL hygromycin.

614 In the case of the double HDAC1+2 knock-down, cells were infected first with the shRNA against  
615 HDAC1, selected using blasticidin, and then infected with a second virus containing the shRNA against  
616 HDAC2. After 72h of hygromycin selection, double infected cells were EMT induced with tamoxifen for  
617 24h.

618

### 619 **UV cross-linked RNA-Immunoprecipitation**

620 The day before collection, 10<sup>7</sup> cells were seeded per condition and IP reaction (5x10<sup>6</sup> for PTB and 5x10<sup>6</sup>  
621 for normal mouse IgG1 IP's) in a p15 plate. Next, day, cell media was discarded and each plate was  
622 washed with 12 ml of cold PBS 1X (D8537, Sigma-Aldrich). Cells were UV-crosslinked at 254 nm with  
623 2000 J/m<sup>2</sup> in ice and scrapped. After centrifugation at 2500 rpm for 5 min, the PBS was discarded and  
624 the pellets were stored at -80 °C until processing. Cells were lysed in 617.5  $\mu$ l of cell lysis buffer (1% v/v  
625 NP-40, 400 U/ml of RNase inhibitor in 1x PBS) for 10 min in ice. Sodium deoxycholate was added to  
626 0.5% v/v final concentration and samples were incubated with rotation for 15 min at 4°C. Samples were  
627 incubated at 37 °C with 30 U of DNase with shacking at 300 rpm, vortexed briefly and sonicated for 10  
628 cycles x (30" on /30" off, high setting condition) in 15 ml conical polystyrene tubes using a Bioruptor™  
629 (Diagenode) sonicator with a 4°C water bath cold circulation system. After that, the tubes were spun to  
630 recover all sample and centrifuged for 15 min at 21,130 rcf to remove insoluble debris. Every sample  
631 was divided in 2 x 300  $\mu$ l aliquots and 30  $\mu$ l were saved as « Input » control and stored at -80 °C. Every  
632 aliquot was incubated with 6 $\mu$ g of  $\alpha$ -PTB (Ref. 32-4800, Invitrogen) or 6 $\mu$ g of  $\alpha$ -normal mouse control  
633 IgG1 (Ref. 14-4714-82, Invitrogen), o/n with rotation at 4°C. Next day, 40  $\mu$ l of Dynabeads protein G  
634 (Ref. 10009D, Invitrogen), pre-washed three times with 1ml 1xPBS 0.01% v/v Tween-20, were added  
635 per sample and incubated for 4h at 4°C with rotation. The unbound supernatant was discarded and  
636 beads were washed once with Cell Lysis Buffer (1% v/v NP-40, 0.5% sodium deoxycholate in 1X PBS),  
637 three times with Washing Buffer I (1% v/v NP-40, 0.5% sodium deoxycholate, 300mM NaCl in 1X PBS),  
638 once with Washing Buffer II (0.5% v/v NP-40, 0.5% sodium deoxycholate, 0.125% v/v SDS in 1X PBS)  
639 and once in PBS 1X. All washes were done for 5 min with rotation at 4°C. Beads and Inputs were  
640 incubated with 100 $\mu$ l of Proteinase K buffer (100 mM Tris-HCl pH 8, 50 mM NaCl, 10 mM EDTA, 0.5%  
641 v/v SDS, 100 U RNasin of in DEPC water) and 10  $\mu$ l of Proteinase K for 45 min at 25°C shacking at  
642 1,500 rpm. 1ml of Trizol® (Ambion) was added per sample (beads or input) and RNA was purified  
643 according to manufacturer's protocol, including 1 $\mu$ l of Glycoblu™ Coprecipitant (Ref. AM9515,  
644 Invitrogen). RNA pellets were resuspended in 8 $\mu$ l of DEPC water and incubated with  $\mu$ l (1U DNase) and

645 1 µl of 10X DNase buffer (Ref. M6101, Promega) for 30 min at 37°C. The DNase was inactivated with  
646 1 µl of Stop Solution at 65°C for 10 min and RT was performed using Transcriptor First Strand cDNA  
647 Synthesis Kit (Ref. 04 897 030 001, Roche) in a final volume of 20 µl. RT was diluted 1/5 and each  
648 sample was quantified in duplicates as described before. The enrichment of every IP was normalized to  
649 its Input using ( $2^{-(Ct\ IP - Ct\ Input)}$ ) and for representation the fold change was calculated relative to IgG  
650 enrichment.

651

### 652 **Motif search analysis**

653 RNA binding motif search analysis was done using CTNND1 exon2 sequence in four public softwares:  
654 RBPDB v1.3 (<http://rbpdb.ccb.utoronto.ca>), RBPMAP v1.1 (<http://rbpmap.technion.ac.il>), SFMAP v1.8  
655 (<http://sfmap.technion.ac.il/>), Spliceaid (<http://www.introni.it/splicing.html>). All softwares were used with  
656 the default parameter settings, except for some exceptions. For RBPDB the threshold 0.8 was applied.  
657 For RBPMAP, the Stringency level used was “High stringency” with all motifs available from  
658 Human/mouse. For SFMAP both “Perfect match” and “High stringency” stringency levels were used.  
659 For catRAPID, the following settings were used: “Full-length proteins”, “RNA and DNA binding” and  
660 including “disordered proteins. We prioritized the RNA motifs predicted by more than one database and  
661 expressed in MCF10a cells.

662

### 663 **P Values and Statistical Analysis**

664 Two-tailed paired Student’s t-test was used in all Figures and Supplementary Figures. P-values and  
665 other details can be found in figure legends.

666

### 667 **References and Notes**

- 668 1. Javaid, S. *et al.* Dynamic Chromatin Modification Sustains Epithelial-Mesenchymal Transition  
669 following Inducible Expression of Snail-1. *Cell reports* **5**, 1679–89 (2013).
- 670 2. Shapiro, I. M. *et al.* An EMT-driven alternative splicing program occurs in human breast cancer  
671 and modulates cellular phenotype. *PLoS Genet* **7**, e1002218 (2011).
- 672 3. Daguene, E., Dujardin, G. & Valcarcel, J. The pathogenicity of splicing defects: mechanistic  
673 insights into pre-mRNA processing inform novel therapeutic approaches. *EMBO Rep* **16**, 1640–55  
674 (2015).
- 675 4. de la Mata, M. *et al.* A slow RNA polymerase II affects alternative splicing in vivo. *Mol Cell* **12**,  
676 525–32 (2003).

- 677 5. Braunschweig, U., Gueroussov, S., Plocik, A. M., Graveley, B. R. & Blencowe, B. J. Dynamic  
678 integration of splicing within gene regulatory pathways. *Cell* **152**, 1252–69 (2013).
- 679 6. Luco, R. F., Allo, M., Schor, I. E., Kornblihtt, A. R. & Misteli, T. Epigenetics in alternative pre-  
680 mRNA splicing. *Cell* **144**, 16–26 (2011).
- 681 7. Guo, R. *et al.* BS69/ZMYND11 reads and connects histone H3.3 lysine 36 trimethylation-  
682 decorated chromatin to regulated pre-mRNA processing. *Mol Cell* **56**, 298–310 (2014).
- 683 8. Luco, R. F. *et al.* Regulation of alternative splicing by histone modifications. *Science* **327**, 996–  
684 1000 (2010).
- 685 9. Pradeepa, M. M., Sutherland, H. G., Ule, J., Grimes, G. R. & Bickmore, W. A. Psip1/Ledgf p52  
686 Binds Methylated Histone H3K36 and Splicing Factors and Contributes to the Regulation of  
687 Alternative Splicing. *PLoS Genet* **8**, e1002717 (2012).
- 688 10. Sims, R. J. *et al.* Recognition of trimethylated histone H3 lysine 4 facilitates the recruitment of  
689 transcription postinitiation factors and pre-mRNA splicing. *Mol Cell* **28**, 665–76 (2007).
- 690 11. Gunderson, F. Q. & Johnson, T. L. Acetylation by the transcriptional coactivator Gcn5 plays a  
691 novel role in co-transcriptional spliceosome assembly. *PLoS Genet* **5**, e1000682 (2009).
- 692 12. Agirre, E., Oldfield, A., Bellora, N., Segelle, A. & Luco, R. F. Splicing-associated chromatin  
693 signatures: a combinatorial and position-dependent role for histone marks in splicing definition.  
694 *Nature comm* **12**, 682 (2021).
- 695 13. Li, T., Liu, Q., Garza, N., Kornblau, S. & Jin, V. X. Integrative analysis reveals functional and  
696 regulatory roles of H3K79me2 in mediating alternative splicing. *Genome Med* **10**, 30 (2018).
- 697 14. Xu, Y., Zhao, W., Olson, S. D., Prabhakara, K. S. & Zhou, X. Alternative splicing links histone  
698 modifications to stem cell fate decision. *Genome Biol* **19**, 133 (2018).
- 699 15. Gonzalez, I. *et al.* A lncRNA regulates alternative splicing via establishment of a splicing-specific  
700 chromatin signature. *Nat Struct Mol Biol* **22**, 370–6 (2015).
- 701 16. Ranieri, D. *et al.* Expression of the FGFR2 mesenchymal splicing variant in epithelial cells drives  
702 epithelial-mesenchymal transition. *Oncotarget* **7**, 5440–60 (2016).

- 703 17. Yanagisawa, M. *et al.* A p120 catenin isoform switch affects Rho activity, induces tumor cell  
704 invasion, and predicts metastatic disease. *J Biol Chem* **283**, 18344–54 (2008).
- 705 18. Hilton, I. B. *et al.* Epigenome editing by a CRISPR-Cas9-based acetyltransferase activates genes  
706 from promoters and enhancers. *Nat Biotechnol* **33**, 510–7 (2015).
- 707 19. Margueron, R. & Reinberg, D. The Polycomb complex PRC2 and its mark in life. *Nature* **469**, 343–  
708 9 (2011).
- 709 20. Hong, S. *et al.* Identification of JmjC domain-containing UTX and JMJD3 as histone H3 lysine 27  
710 demethylases. *PNAS* **104**, 18439–18444 (2007).
- 711 21. Siam, A. *et al.* Regulation of alternative splicing by p300-mediated acetylation of splicing factors.  
712 *RNA* **25**, 813–824 (2019).
- 713 22. Mujtaba, S. *et al.* Epigenetic transcriptional repression of cellular genes by a viral SET protein.  
714 *Nat. Cell Biol.* **10**, 1114–1122 (2008).
- 715 23. Ha, K. *et al.* Histone deacetylase inhibitor treatment induces ‘BRCAness’ and synergistic lethality  
716 with PARP inhibitor and cisplatin against human triple negative breast cancer cells. *Oncotarget* **5**,  
717 5637–5650 (2014).
- 718 24. Montgomery, R. L. *et al.* Histone deacetylases 1 and 2 redundantly regulate cardiac  
719 morphogenesis, growth, and contractility. *Genes Dev.* **21**, 1790–1802 (2007).
- 720 25. Yearim, A. *et al.* HP1 is involved in regulating the global impact of DNA methylation on alternative  
721 splicing. *Cell reports* **10**, 1122–34 (2015).
- 722 26. Young, J. I. *et al.* Regulation of RNA splicing by the methylation-dependent transcriptional  
723 repressor methyl-CpG binding protein 2. *Proc Natl Acad Sci U S A* **102**, 17551–8 (2005).
- 724 27. Girardot, M. *et al.* SOX9 has distinct regulatory roles in alternative splicing and transcription.  
725 *Nucleic Acids Res* **46**, 9106–9118 (2018).
- 726 28. Tripathi, V. *et al.* Direct Regulation of Alternative Splicing by SMAD3 through PCBP1 Is Essential  
727 to the Tumor-Promoting Role of TGF- $\beta$ . *Mol. Cell* **64**, 549–564 (2016).
- 728 29. Warzecha, C. C. *et al.* An ESRP-regulated splicing programme is abrogated during the epithelial-  
729 mesenchymal transition. *EMBO J* **29**, 3286–300 (2010).

- 730 30. Carstens, R. P., Eaton, J. V., Krigman, H. R., Walther, P. J. & Garcia-Blanco, M. A. Alternative  
731 splicing of fibroblast growth factor receptor 2 (FGF-R2) in human prostate cancer. *Oncogene* **15**,  
732 3059–65 (1997).
- 733 31. Sebestyén, E., Zawisza, M. & Eyras, E. Detection of recurrent alternative splicing switches in  
734 tumor samples reveals novel signatures of cancer. *Nucleic Acids Res* **43**, 1345–1356 (2015).
- 735 32. Villemin, J.-P. *et al.* A cell-to-patient machine learning transfer approach uncovers novel basal-like  
736 breast cancer prognostic markers amongst alternative splice variants. *BMC Biology* **19**, 70 (2021).
- 737 33. Sanidas, I. *et al.* Phosphoproteomics screen reveals akt isoform-specific signals linking RNA  
738 processing to lung cancer. *Mol Cell* **53**, 577–90 (2014).
- 739 34. Gabut, M. *et al.* An alternative splicing switch regulates embryonic stem cell pluripotency and  
740 reprogramming. *Cell* **147**, 132–46 (2011).
- 741 35. Martin Anduaga, A. *et al.* Thermosensitive alternative splicing senses and mediates temperature  
742 adaptation in *Drosophila*. *eLife* **8**, e44642 (2019).
- 743 36. Pajoro, A., Severing, E., Angenent, G. C. & Immink, R. G. H. Histone H3 lysine 36 methylation  
744 affects temperature-induced alternative splicing and flowering in plants. *Genome Biol* **18**, 102  
745 (2017).
- 746 37. Petrillo, E. *et al.* A chloroplast retrograde signal regulates nuclear alternative splicing. *Science*  
747 **344**, 427–430 (2014).
- 748 38. Jonkers, I., Kwak, H. & Lis, J. T. Genome-wide dynamics of Pol II elongation and its interplay with  
749 promoter proximal pausing, chromatin, and exons. *eLife* **3**, e02407 (2014).
- 750 39. Thompson, P. J. *et al.* hnRNP K coordinates transcriptional silencing by SETDB1 in embryonic  
751 stem cells. *PLoS Genet* **11**, e1004933 (2015).
- 752 40. Wei, C. *et al.* RBFox2 Binds Nascent RNA to Globally Regulate Polycomb Complex 2 Targeting in  
753 Mammalian Genomes. *Mol Cell* **62**, 875–889 (2016).
- 754 41. Kfir, N. *et al.* SF3B1 association with chromatin determines splicing outcomes. *Cell reports* **11**,  
755 618–29 (2015).

- 756 42. Weinert, B. T. *et al.* Time-Resolved Analysis Reveals Rapid Dynamics and Broad Scope of the  
757 CBP/p300 Acetylome. *Cell* **174**, 231-244.e12 (2018).
- 758 43. Rahhal, R. & Seto, E. Emerging roles of histone modifications and HDACs in RNA splicing.  
759 *Nucleic Acids Res* **47**, 4911–4926 (2019).
- 760 44. Roovers, K. *et al.* The Ste20-like kinase SLK is required for ErbB2-driven breast cancer cell  
761 motility. *Oncogene* **28**, 2839–2848 (2009).
- 762 45. Wenzel, J. *et al.* Loss of the nuclear Wnt pathway effector TCF7L2 promotes migration and  
763 invasion of human colorectal cancer cells. *Oncogene* **39**, 3893–3909 (2020).
- 764 46. Ellis, L., Atadja, P. W. & Johnstone, R. W. Epigenetics in cancer: targeting chromatin  
765 modifications. *Mol Cancer Ther* **8**, 1409–20 (2009).
- 766 47. Manzur, K. L. *et al.* A dimeric viral SET domain methyltransferase specific to Lys27 of histone H3.  
767 *Nat. Struct. Biol.* **10**, 187–196 (2003).
- 768 48. Voigt, P. *et al.* Asymmetrically modified nucleosomes. *Cell* **151**, 181–193 (2012).

769  
770

## 771 **Acknowledgments**

772 We are thankful to Dr. Haber for the EMT cellular model, Dr. Bertrand for the modified gRNA plasmid,  
773 Dr. Salton for plasmid reagents, Dr. Duckett for EZH2 plasmid, Dr. Pradeepa for Sid4x plasmid and  
774 Dr. Ge for UTX1 plasmid. We are also thankful to Paola Scaffidi, Andrew Oldfield, and Bernard de  
775 Massy for critical reading and discussion of the manuscript.

776

777 **Funding:** This work was supported by the ANR program Labex EpiGenMed (to A.S. and Y.N.A), La  
778 Ligue contre le Cancer (to A.S.), the ANR Young Investigator grant (ANR-16-CE12-0012-01 to R.L),  
779 the Wellcome Trust ([104175/Z/14/Z], Sir Henry Dale Fellowship to P.V.) and through funding from the  
780 European Research Council (ERC) under the European Union’s Horizon 2020 research and innovation  
781 programme (ERC-STG grant agreement No. 639253 to P.V.). The Institut de Génétique Humaine is  
782 supported by the Centre National de la Recherche Scientifique and the University of Montpellier. The  
783 Wellcome Centre for Cell Biology is supported by core funding from the Wellcome Trust [203149]. We  
784 are grateful to Montpellier’s MRI image facility and the Edinburgh Protein Production Facility (EPPF) for  
785 their support. The EPPF was supported by the Wellcome Trust through a Multi-User Equipment grant  
786 [101527/Z/13/Z].

787

788 **Author contributions:** Conceptualization: A.S., Y.N.A. and R.L.; Methodology & Investigation: A.S.,  
789 Y.N.A. and K.W.; Resources: P.V.; Writing & editing: A.S., Y.N.A., A.O., P.V. and R.L.; Funding  
790 Acquisition: P.V. and R.L.

791

792 **Competing interests:** No competing interests.

793

794 **Data and materials availability:** see Resources Table

795

796 **Resources table**

797 Supplementary List: List of Reagents and resources

798 Supplementary Table S1: List of CHIP-qPCR primers

799 Supplementary Table S2: List of RT-qPCR primers

800 Supplementary Table S3: List of Polymerase II elongation assay and RNA-IP primers

801 Supplementary Table S4: List of gRNAs

802 Supplementary Table S5: List of shRNAs

803 Supplementary Table S6: List of cloning primers

804

805

806

807



**A**

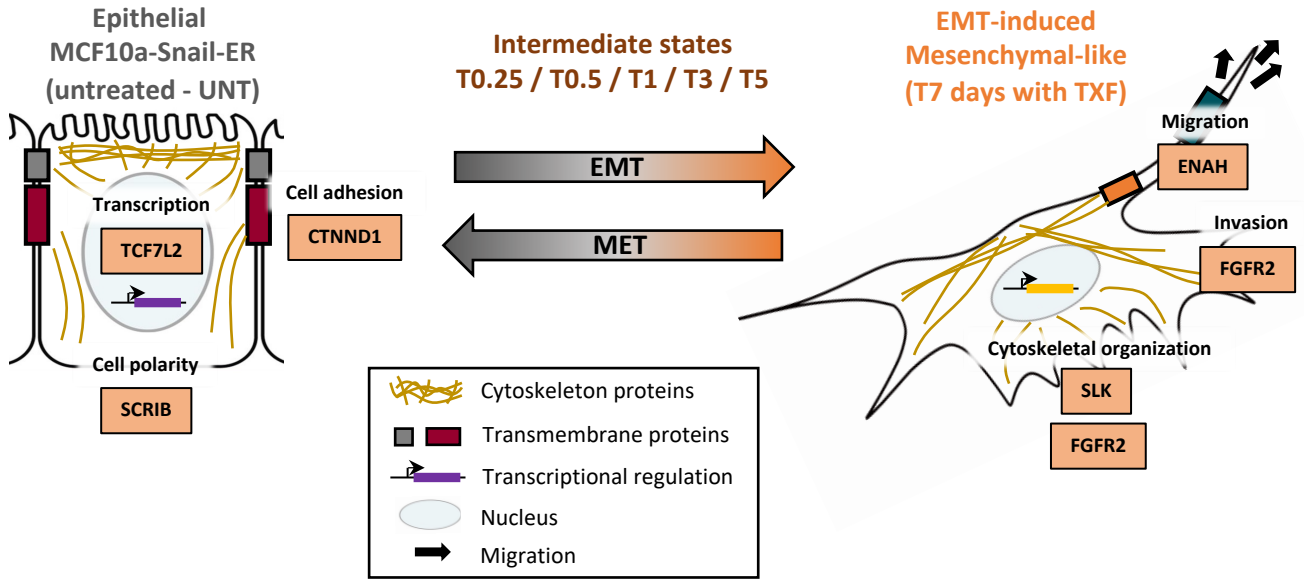

**B** *CTNND1* – primers positions

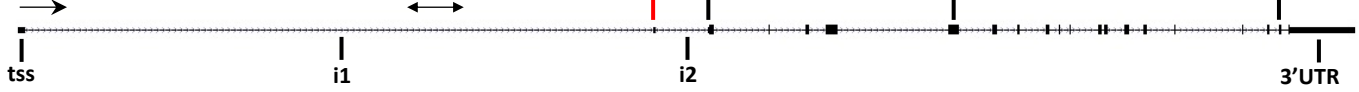

**C**

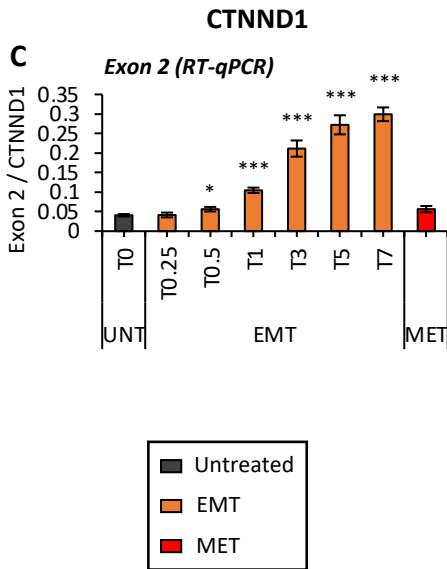

**D** Normalized H3K27me3 (ChIP-qPCR)

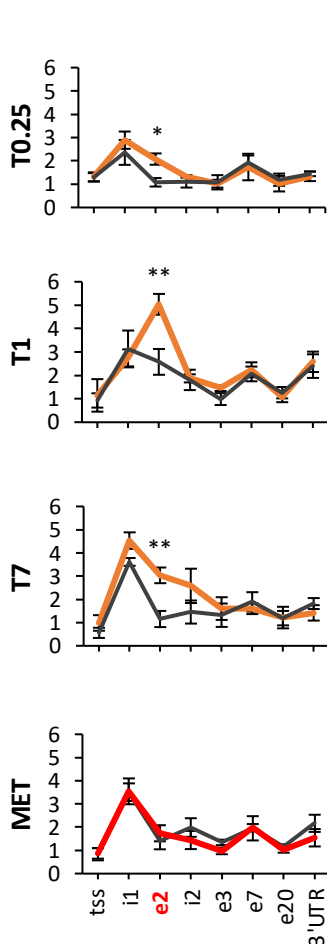

**E** Normalized H3K27ac (ChIP-qPCR)

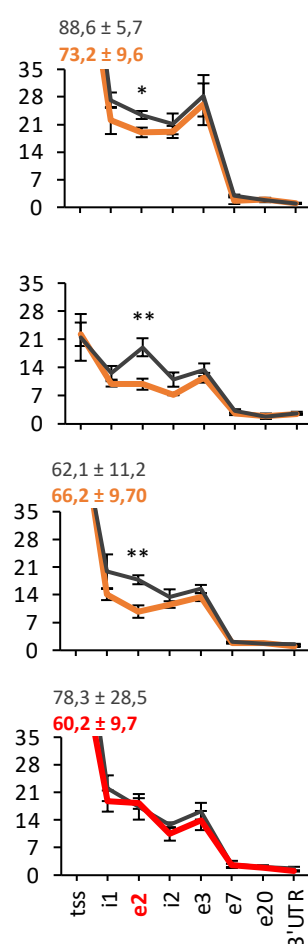

**F** Normalized H3K4me1 (ChIP-qPCR)

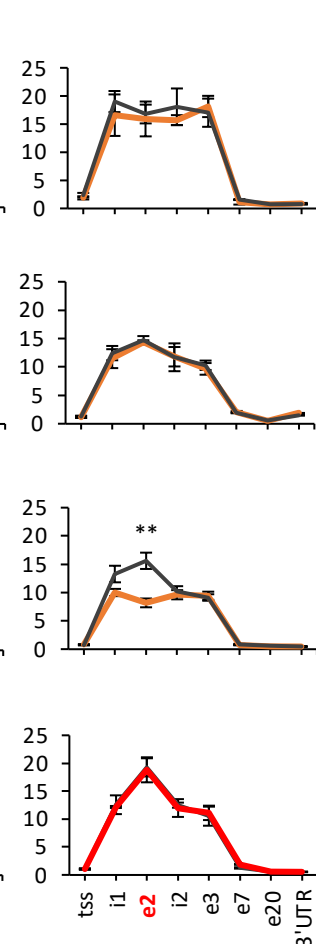

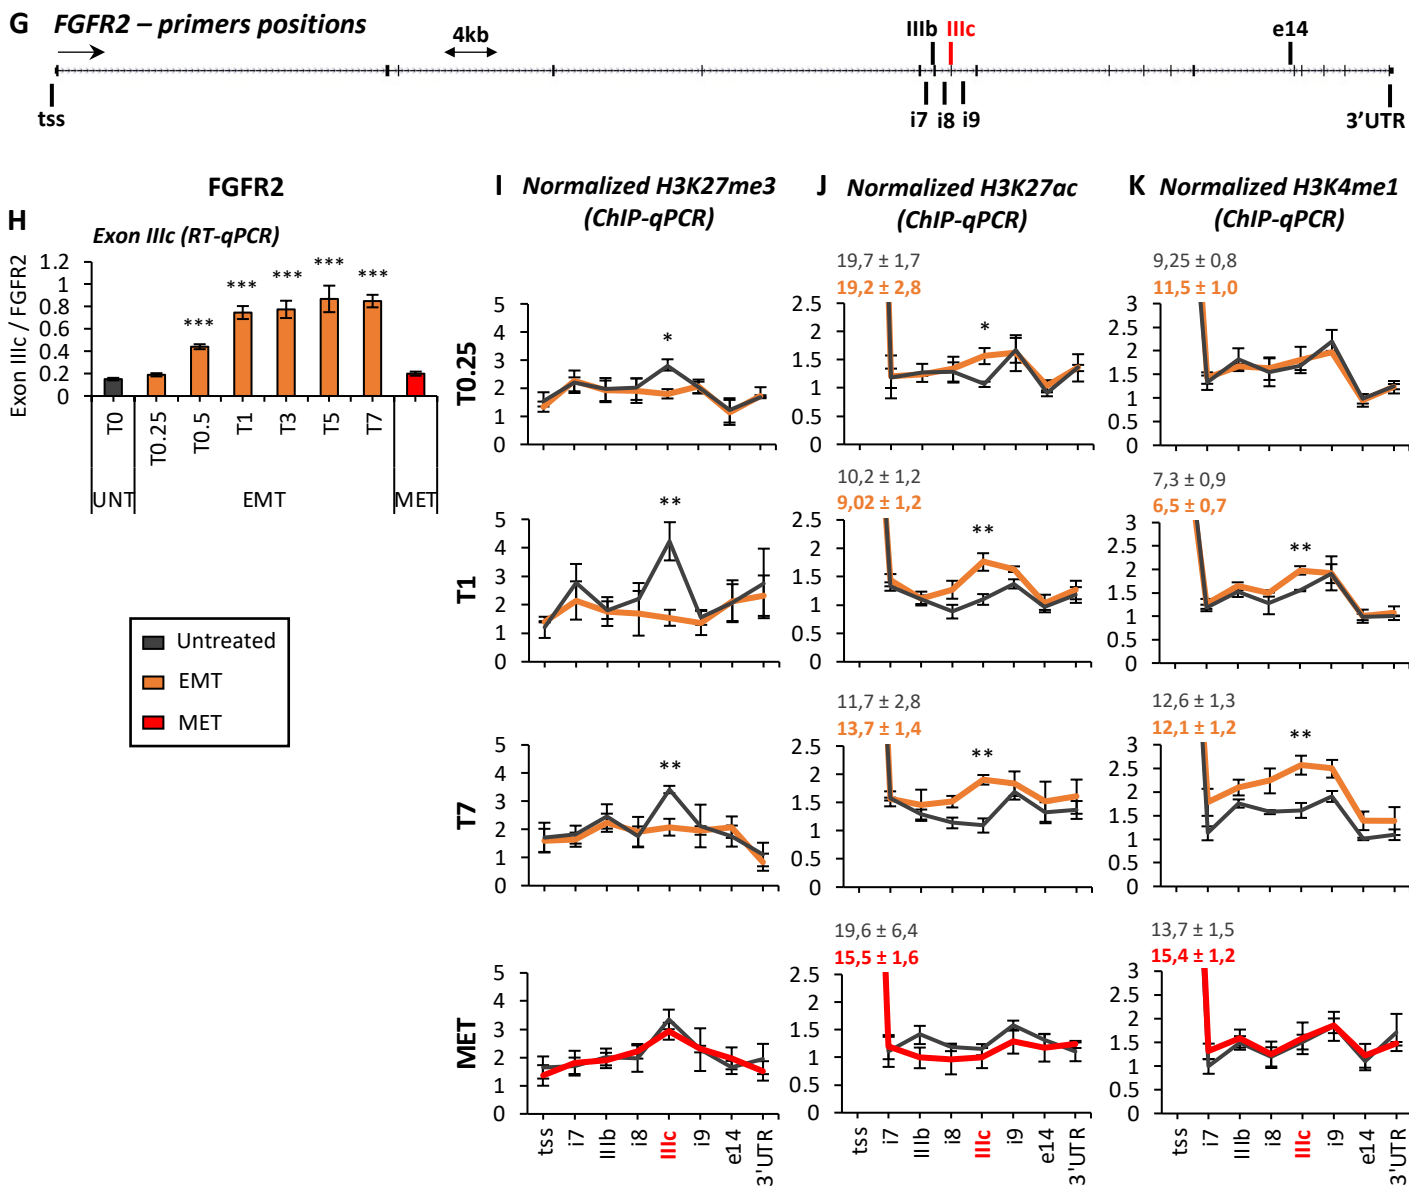

**Figure 1: Specific histone modifications correlate in time with dynamic changes in splicing during EMT.**

(A) Schematic representation of the epithelial-to-mesenchymal transition (EMT) and reverse MET. The function of the alternatively spliced genes most relevant for EMT transition is shown. Normal human epithelial MCF10a-Snail-ER are totally reprogrammed into mesenchymal-like cells in 7 days (T7). First changes in EMT markers are observed 6h (T0.25) after treatment with tamoxifen (TXF). Until the EMT induction is complete, there are several intermediate states in which heterogenous populations of cells coexist. (B,G) Representation of *CTNND1* and *FGFR2* gene loci in which the position of the primers used for ChIP-qPCR experiments is indicated. Highlighted in red are the alternatively spliced exons regulated during EMT (C, H) Inclusion levels of *CTNND1* exon 2 and *FGFR2* exon IIIc relative to total expression levels of *CTNND1* and *FGFR2*, respectively, in MCF10a-Snail-ER cells at different time points during induction of the EMT (0 to 7 days in presence of tamoxifen, orange) and reversible MET (21 days after removal of the tamoxifen at T7, red). RT-qPCR results are shown as the mean  $\pm$  SEM of  $n=4$  biological replicates. (D-F and I-K) Enrichment levels of H3K27me3 (D, I), H3K27ac (E, J) and H3K4me1 (F, K) along *CTNND1* or *FGFR2* locus, focusing into the alternatively spliced exons of interest (*CTNND1*.e2 and *FGFR2*.IIIc) and flanking intronic and exonic control regions, in tamoxifen-induced MCF10a-Snail-ER cells treated for 6h (T0.25), 24h (T1) or 7 days (T7) with tamoxifen and MET reversed cells in which the tamoxifen was eliminated for 21 days (MET). Chromatin immunoprecipitation results are shown as the mean  $\pm$  SEM in  $n=4$  biological replicates. The percentage of input was normalized by two control regions across the different conditions. \* $P < 0.05$ , \*\* $P < 0.01$ , \*\*\* $P < 0.001$  in two-tail paired Student's t-test respect untreated cells (grey).

### CTNND1

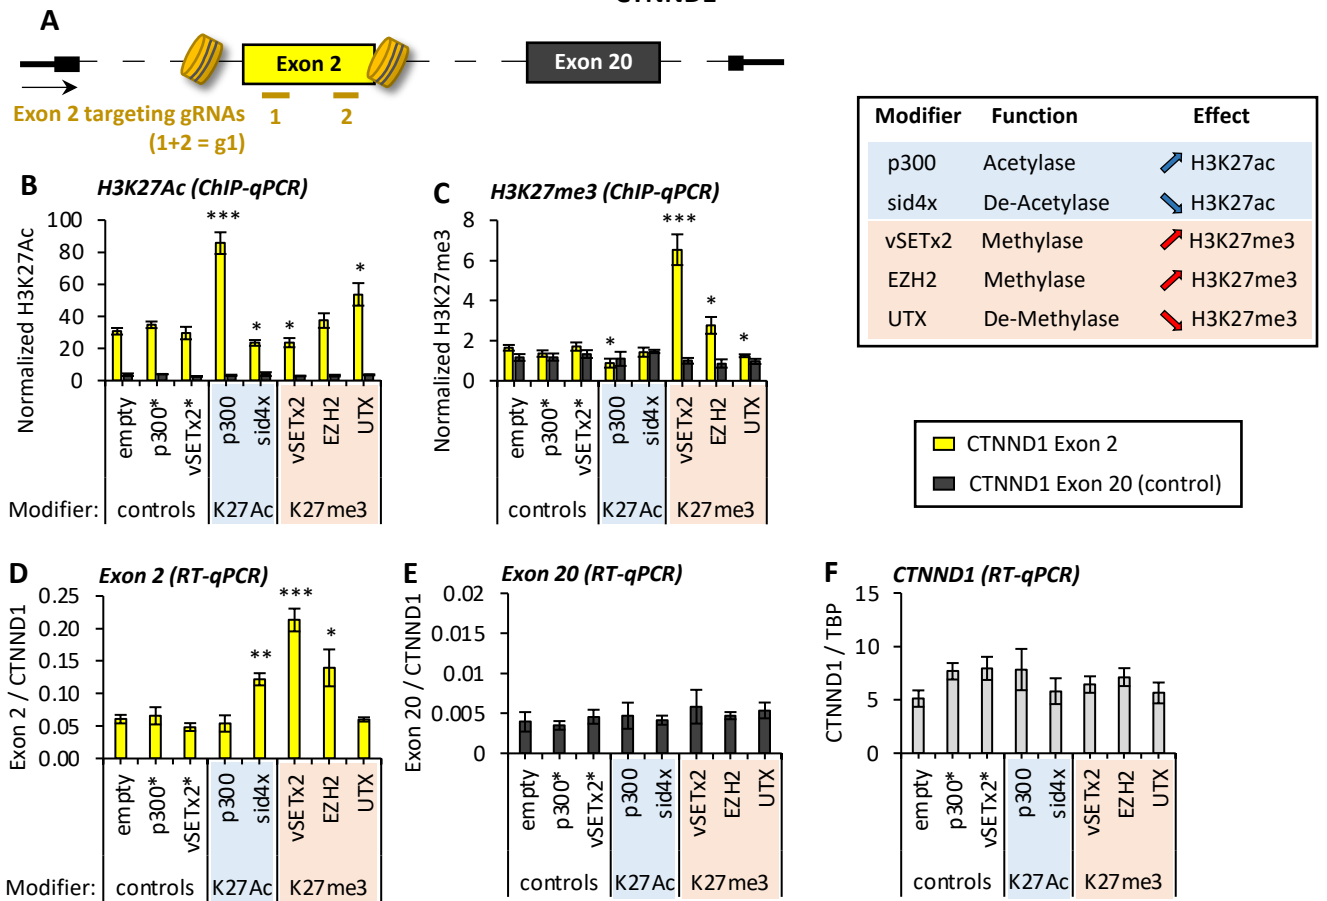

### FGFR2

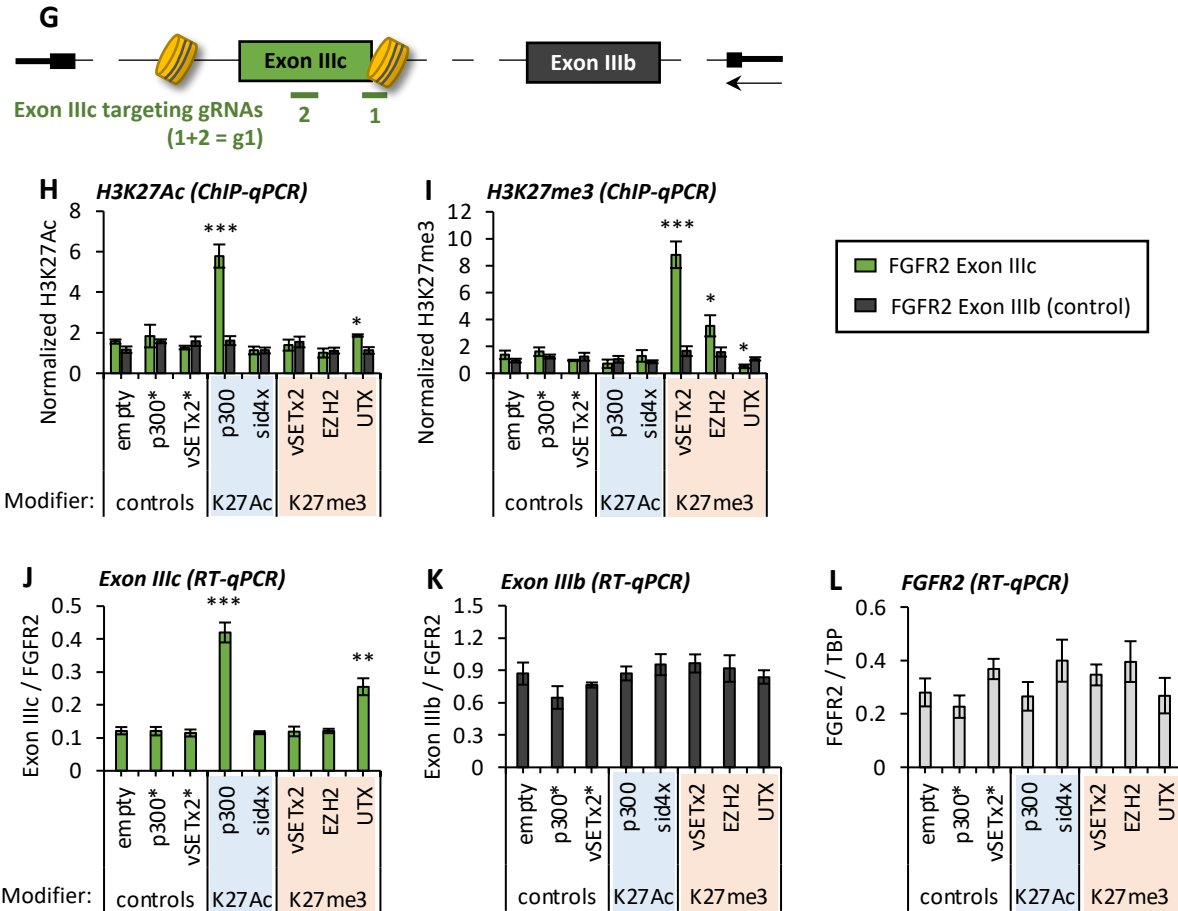

**Figure 2: Exon-specific epigenome editing of H3K27 marks is sufficient to induce a change in splicing.**

**(A)** Schematic representation of CTNND1 gene locus and alternatively spliced exon 2 (yellow) and exon 20 (grey). The position of the gRNAs used to exon-specifically target the different dCas9-fused proteins are represented in colour-coded lines. Nucleosome positioning, according to MNase-qPCR assay (data not shown), is shown in exon 2. **(B,C)** Enrichment levels of H3K27ac (B) and H3K27me3 (C) at CTNND1 exon 2 (yellow) and control exon 20 (grey) in MCF10a-Snail-ER cells upon infection of dCas9 fused to the catalytic domain of an H3K27 epigenetic modifier (see summary table on the right) in the presence of exon-specific gRNAs targeting exon 2, by quantitative chromatin immunoprecipitation (mean +/- SEM, n=4). The percentage of input was normalized by two control regions across the different conditions. Mutated p300\* and vSETx2\* were used as negative controls together with empty dCas9. **(D-F)** Expression levels of CTNND1 exon 2 (D), exon 20 (E), and total CTNND1 (F) relative to total TBP and CTNND1 levels, respectively, in MCF10a-Snail-ER cells upon infection with dCas9 H3K27 epigenome editors and exon 2-specific gRNAs, determined by quantitative RT-qPCR (mean +/- SEM, n=4). **(G)** Schematic representation, as in (A), of FGFR2 gene, gRNAs position at the targeted exon IIIc (green) and nucleosome positioning at exon IIIc (data not shown). **(H,I)** H3K27ac and H3K27me3 enrichment levels at the gRNA-targeted exon IIIc and control IIIb in MCF10a-Snail-ER cells infected with the dCas9 H3K27 modifiers by CHIP as described in (B,C) (mean +/- SEM, n=4). **(J-L)** Expression levels of exon IIIc, control IIIb and total FGFR2, relative to total TBP and FGFR2 expression levels, respectively, by quantitative RT-qPCR as described in D-F (mean +/- SEM, n=4). \*P <0.05, \*\*P <0.01, \*\*\*P <0.001 in two-tail paired Student's t-test respect empty dCas9 plasmid (empty).

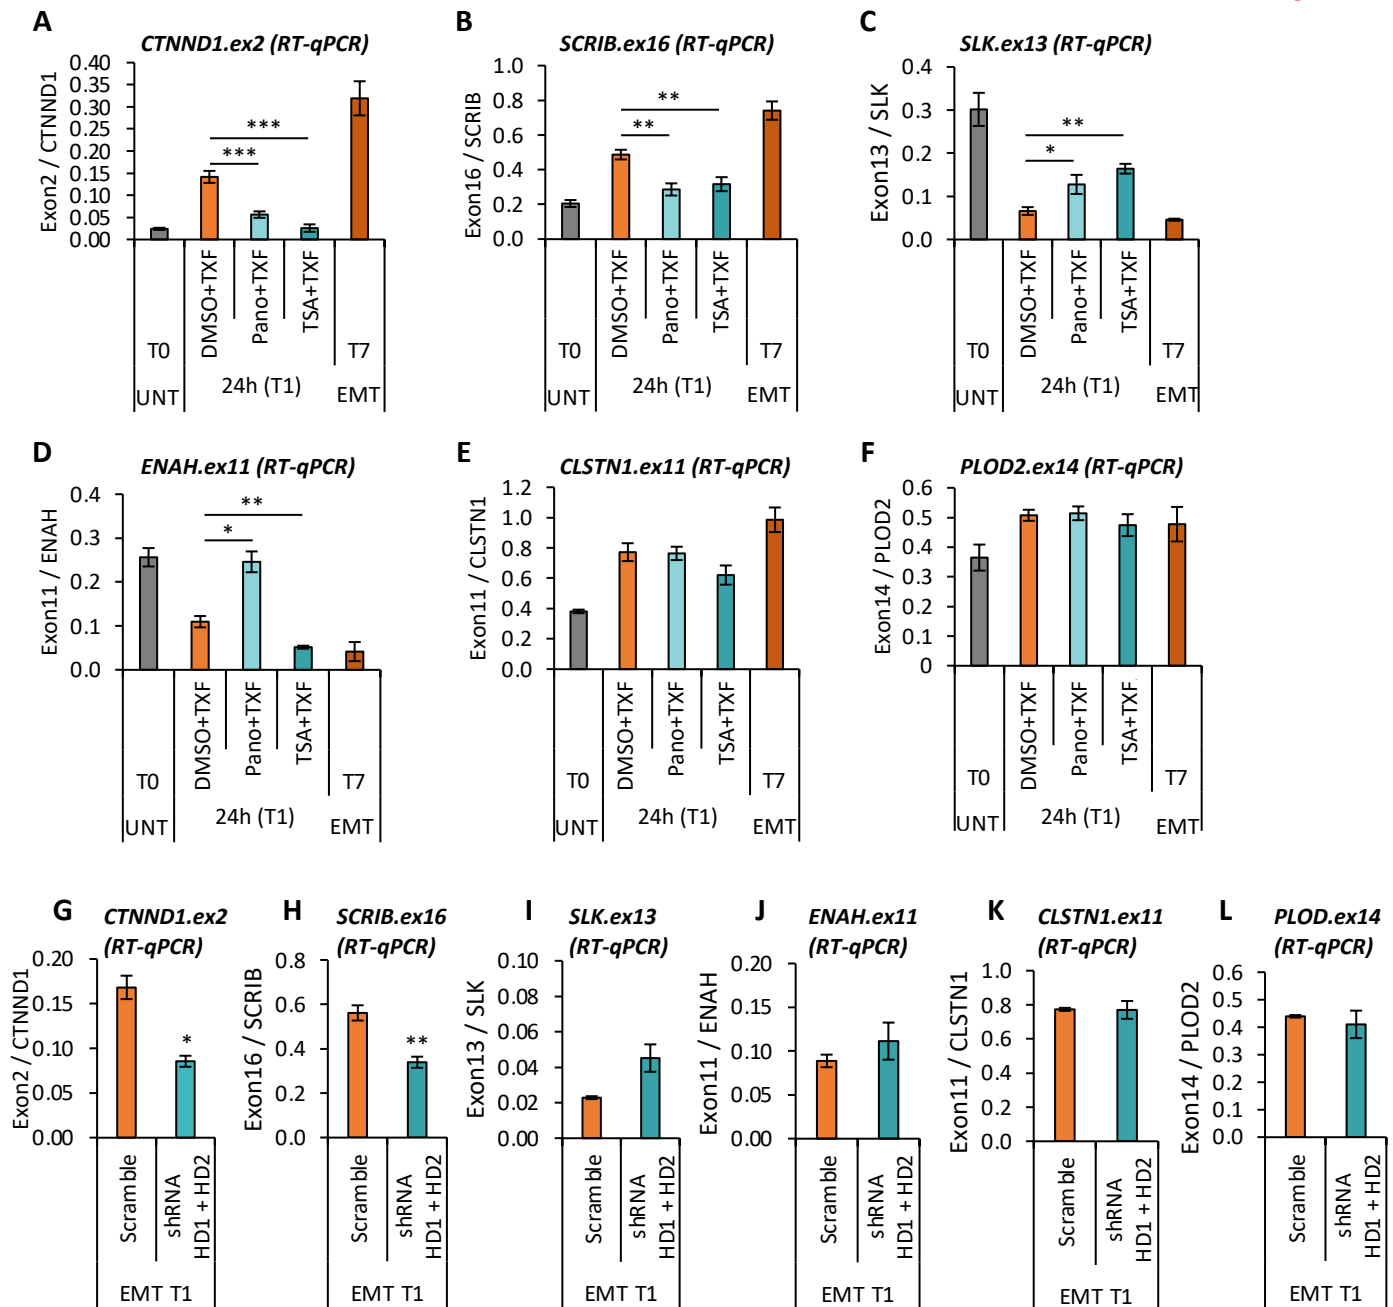

**Figure 3: HDAC inhibition during EMT induction prevents the shift to the mesenchymal-specific isoform at alternatively spliced genes differentially marked by H3K27ac/me3. (A-F)** Inclusion levels of H3K27ac/me3-marked exons (CTNND1, SCRIB, SLK) relative to total expression levels of the corresponding gene in MCF10a-Snail-ER cells treated for 24h with tamoxifen for EMT induction (T1, orange) and 10nM of Pano (Panobinostat, light cyan), 3µg/mL of TSA (Trichostatin A, cyan) or control vehicle (DMSO, orange) for inhibition of the changes in H3K27ac observed during EMT. ENAH, CLSTN1 and PLOD were used as control genes. Untreated (T0, grey) and fully induced (T7, orange) EMT cells are shown as control references. RT-qPCR results are shown as the mean +/- SEM of n=3 biological replicates. **(G-L)** Inclusion levels of the same exons as before relative to total expression levels of the corresponding gene in MCF10a-Snail-ER cells at day 1 of EMT induction upon double knock-down of HDAC1 (HD1) and HDAC2 (HD2). Non-targeting shRNA (scramble) is used as a control. RT-qPCR results are shown as the mean +/- SEM of n=3 biological replicates. \*P <0.05, \*\*P <0.01, \*\*\*P <0.001 in two-tail paired Student's t-test respect T1 DMSO for (A-F) and T1 Scramble for (G-M).

**RNA Polymerase II kinetics  
(DRB + RT-qPCR)**

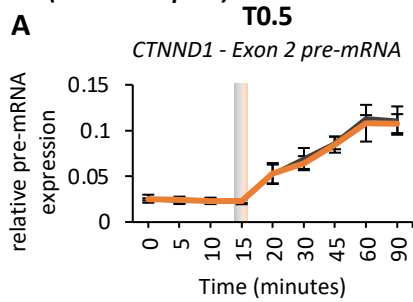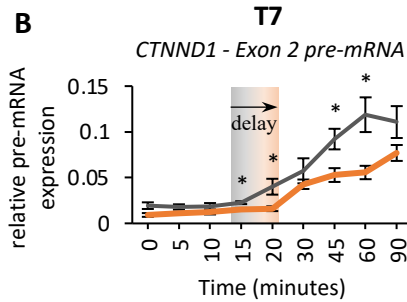

**RNA Polymerase II levels  
(ChIP-qPCR)**

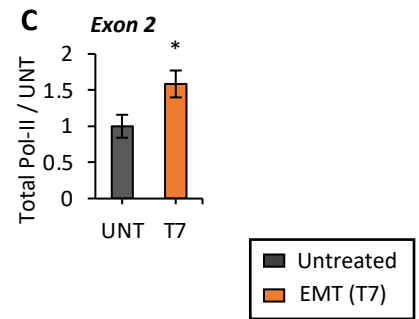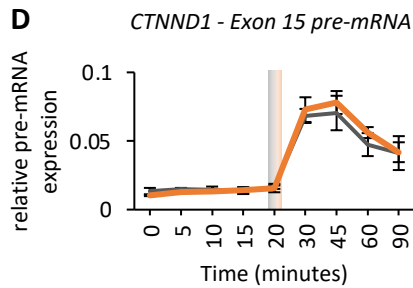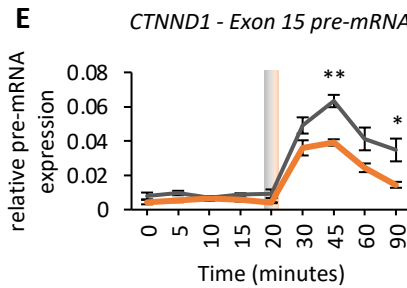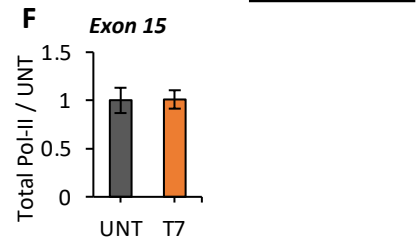

**G RNA motif search analysis**

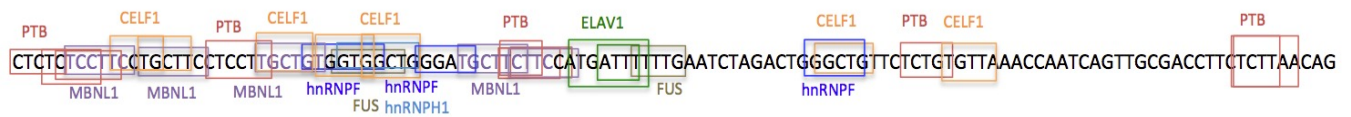

**H Exon 2 (RT-qPCR)**

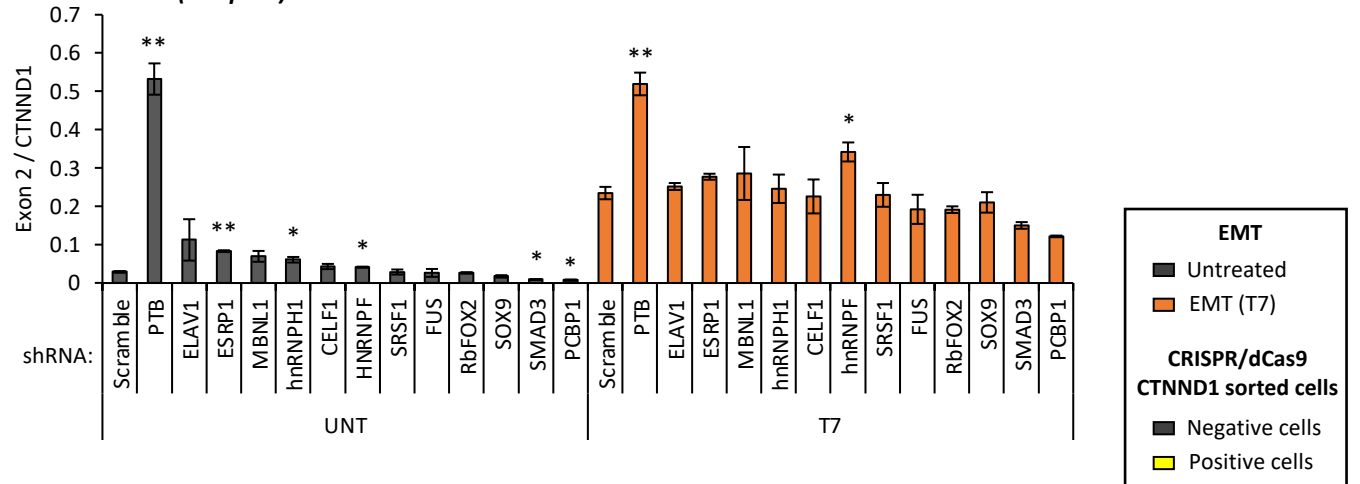

**I CTNND1 - PTB binding (RNA-IP)**

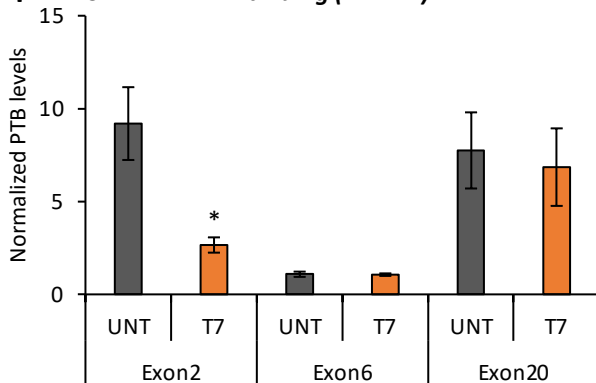

**J CTNND1 - PTB binding (RNA-IP)**

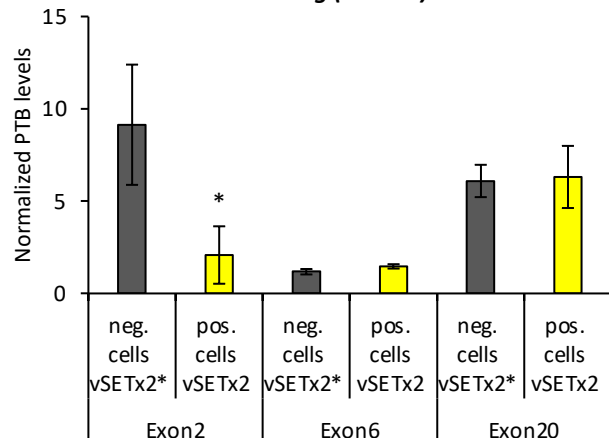

**Figure 4: H3K27 marks regulate splicing by modulating the recruitment of specific splicing factors to the pre-mRNA.** (A,B) Apparition in time of CTNND1 exon 2 pre-mRNA in synchronized untreated (grey) and tamoxifen-induced (orange) MCF10a-Snail-ER cells upon release of the transcriptional inhibitor DRB after 0.5 days (A, T0.5) or 7 days (B, T7) of EMT induction. RT-qPCR results are normalized by tRNA expression levels (mean  $\pm$  SEM, n=3). (C) Total RNA Polymerase II levels at CTNND1 exon 2 in untreated (grey) and tamoxifen-induced (orange) MCF10a-Snail-ER cells by ChIP-qPCR (mean  $\pm$  SEM, n=3). The percentage of input was normalized by two control regions across the different conditions and represented relative to untreated cells (grey). (D-F) Same as (A-C) for CTNND1 control exon 15 (mean  $\pm$  SEM, n=3). \*P <0.05, \*\*P <0.01, \*\*\*P <0.001 in two-tail paired Student's t-test respect untreated cells (grey). (G) Predicted RNA-binding motifs along CTNND1 exon 2 pre-mRNA in at least two of the four software used (RBPDB, RBPMAP, SFMAP and Spliceaid, details in methods). (H) CTNND1 exon 2 inclusion levels upon knock down, using lentiviral shRNAs, of candidate splicing regulators in untreated (grey) and tamoxifen-induced MCF10-Snail-ER (T7, orange) cells. RT-qPCR results are normalized by total CTNND1 expression levels (mean  $\pm$  SEM, n=3). (I) PTB enrichment levels at CTNND1 exon 2 pre-mRNA in untreated (UNT) and tamoxifen-induced (T7) MCF10a-Snail-ER cells. Constitutively included CTNND1 exon 6 and excluded CTNND1 exon 20 were used as negative and positive controls of PTB binding, respectively. The percentage of input in UV-crosslinking RNA immunoprecipitation was normalized by IgG and CTNND1 exon7 control levels (mean  $\pm$  SEM, n=5) (J) PTB enrichment levels at CTNND1 exon 2 and control exon 6 and exon 20 pre-mRNA in cell-sorted cells expressing (positive) or not (negative) the mesenchymal-specific splicing isoform mCTNND1(ex2) in MCF10a-Snail-ER cells infected with dCas9-vSETx2, or mutant dCas9-vSETx2\*, and the exon-specific gRNAs (g1) targeting CTNND1 exon 2. The percentage of input in UV-crosslinking RNA immunoprecipitation was normalized by IgG and CTNND1 exon7 control levels (mean  $\pm$  SEM, n=6). \*P <0.05, \*\*P <0.01 in two-tail paired Student's t-test respect control cells (scramble shRNA or untreated cells).

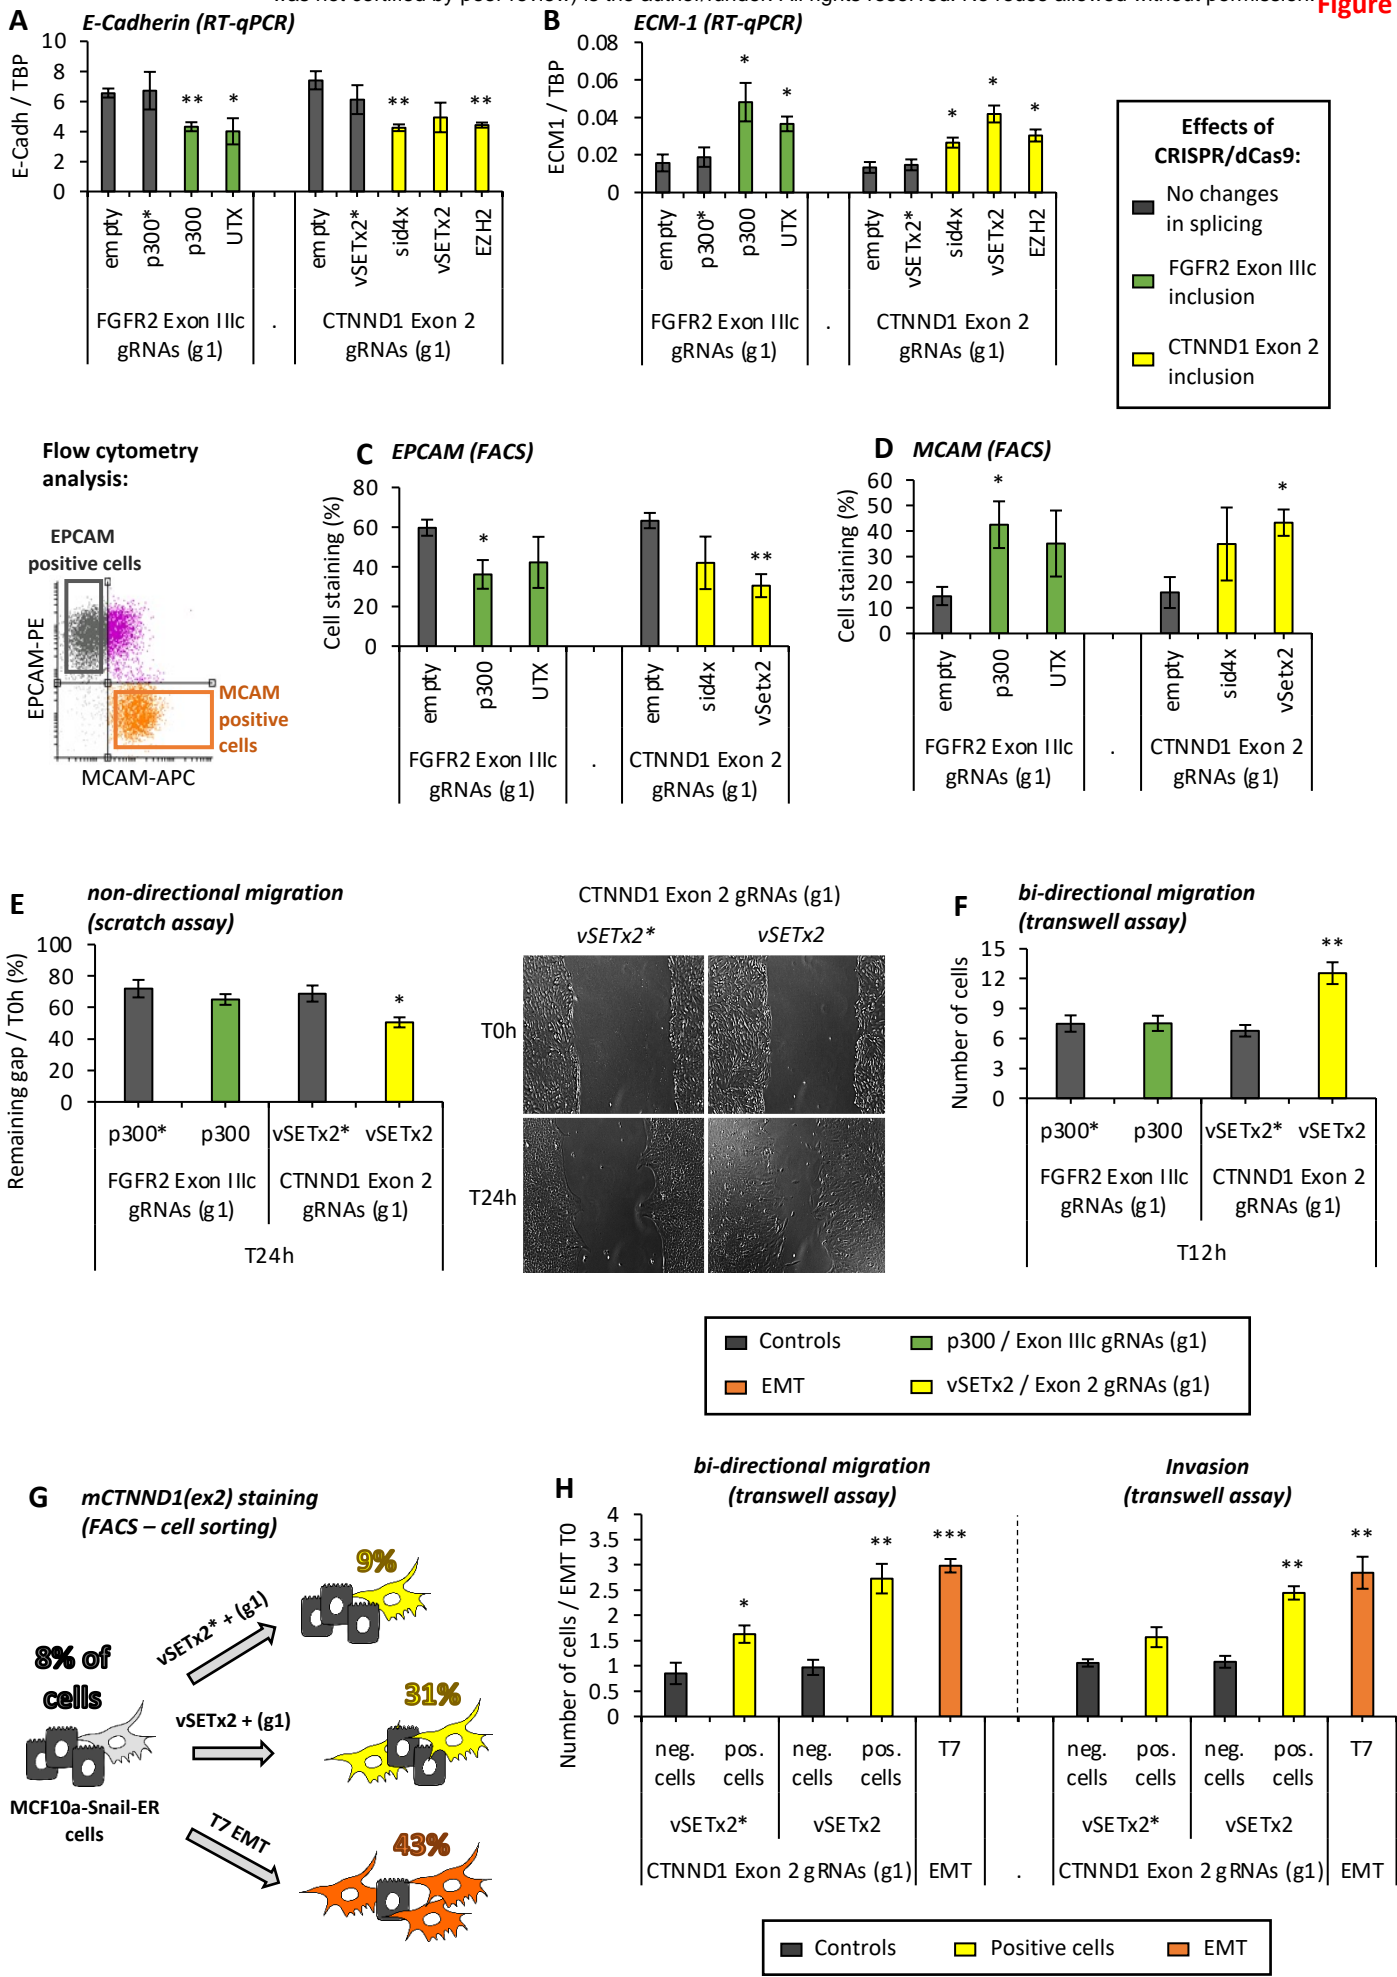



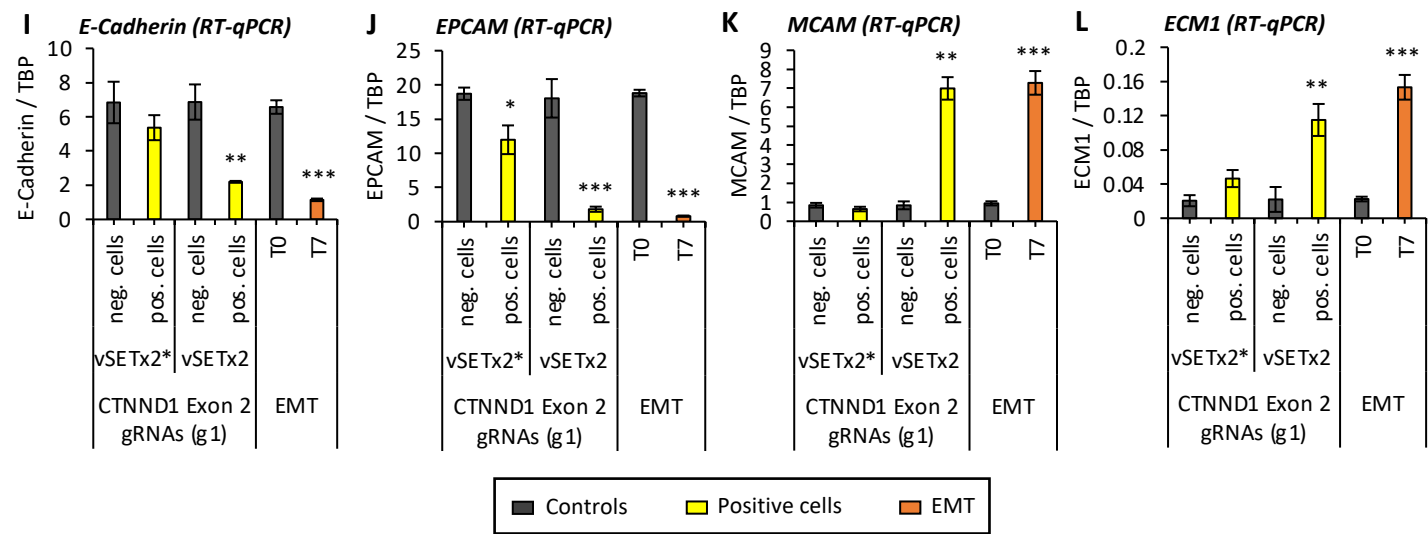

**Figure 5: Chromatin-induced changes in splicing recapitulate an EMT.** (A-D) Expression levels of epithelial (E-Cadherin, EPCAM) and mesenchymal (ECM1, MCAM) markers at the mRNA (A, B - RT-qPCR, mean +/- SEM, n=4) and protein (C,D - Flow cytometry, mean +/- SEM, n=4) levels in MCF10a-Snail-ER cells infected with the dCas9-fused proteins changing splicing and the corresponding exon-specific gRNAs targeting FGFR2 exon IIIc (g1) or CTNND1 exon 2 (g1). mRNA levels are normalized by TBP, and protein levels are quantified above the no primary antibody background signal (summary scheme on the left). (E-F) Functional EMT assays to test non-directional (E) and bi-directional migration (F) in MCF10-Snail-ER cells infected with exon 2 or exon IIIc-specific targeting gRNAs and dCas9-fused proteins with their corresponding catalytic mutants. Scratch assays (E) were carried out on confluent monolayers of cells for evaluating the % of gap remaining 24h after wound (mean +/- SEM, n=3). Transwell assays (F) evaluate the number of cells migrating towards FGF-2 in 12h (mean +/- SEM, n=3). (G) MCF10a-Snail-ER cells infected with gRNAs targeting CTNND1 exon 2 and either dCas9-vSETx2 or mutant dCas9-vSETx2\* were cell-sorted using a splicing-specific antibody detecting only CTNND1 mesenchymal protein variant (mCTNND1(ex2)) for directional migration and invasion transwell assays. Negative cells not expressing mCTNND1(ex2) and tamoxifen-induced T7 EMT cells were used as control references. The percentage of mCTNND1(ex2) positive cells is shown on the right. (H) The number of sorted cells migrating or invading through a matrigel matrix for 24h were normalized to untreated cells for comparison with tamoxifen-induced T7 EMT cells (mean +/- SEM, n=3). (I-L) Expression levels of epithelial (E-Cadherin, EPCAM) and mesenchymal (MCAM, ECM1) markers in cell-sorted MCF10a-Snail-ER cells. RT-qPCR levels were normalized by TBP expression levels (mean +/- SEM, n=3). \*P <0.05, \*\*P <0.01, \*\*\*P <0.001 in two-tail paired Student's t-test respect the corresponding control (empty, dCas9-vSETx2\* or negative cells, all in grey).

**CTNND1**

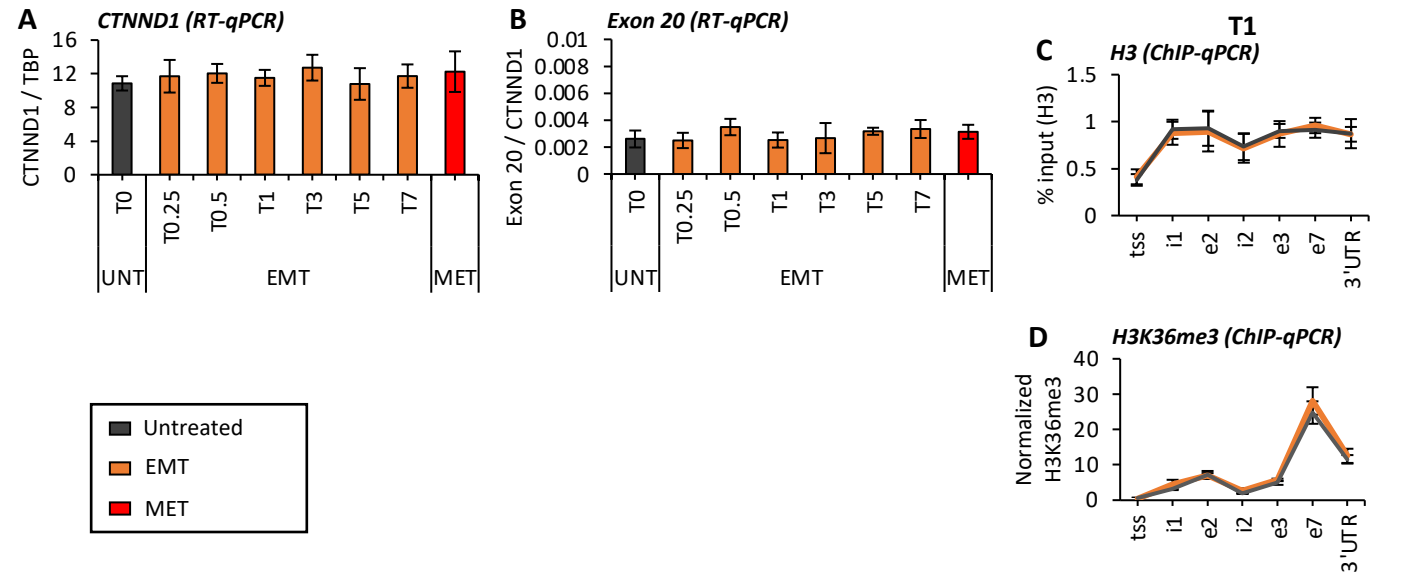

**FGFR2**

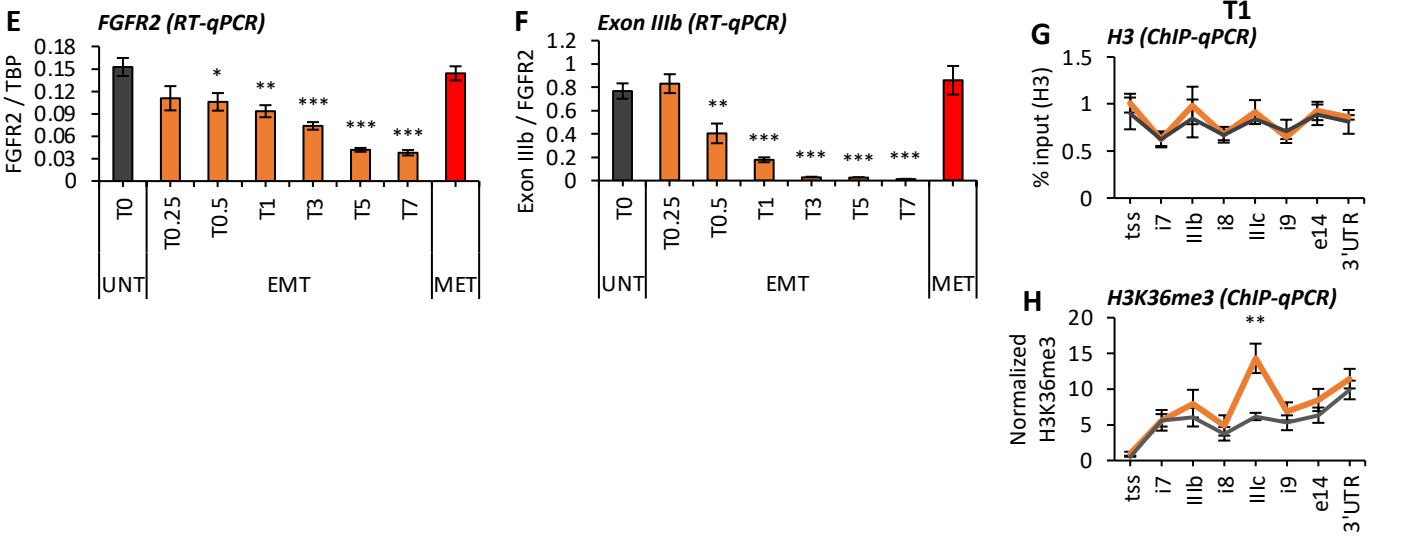

**TCF7L2**

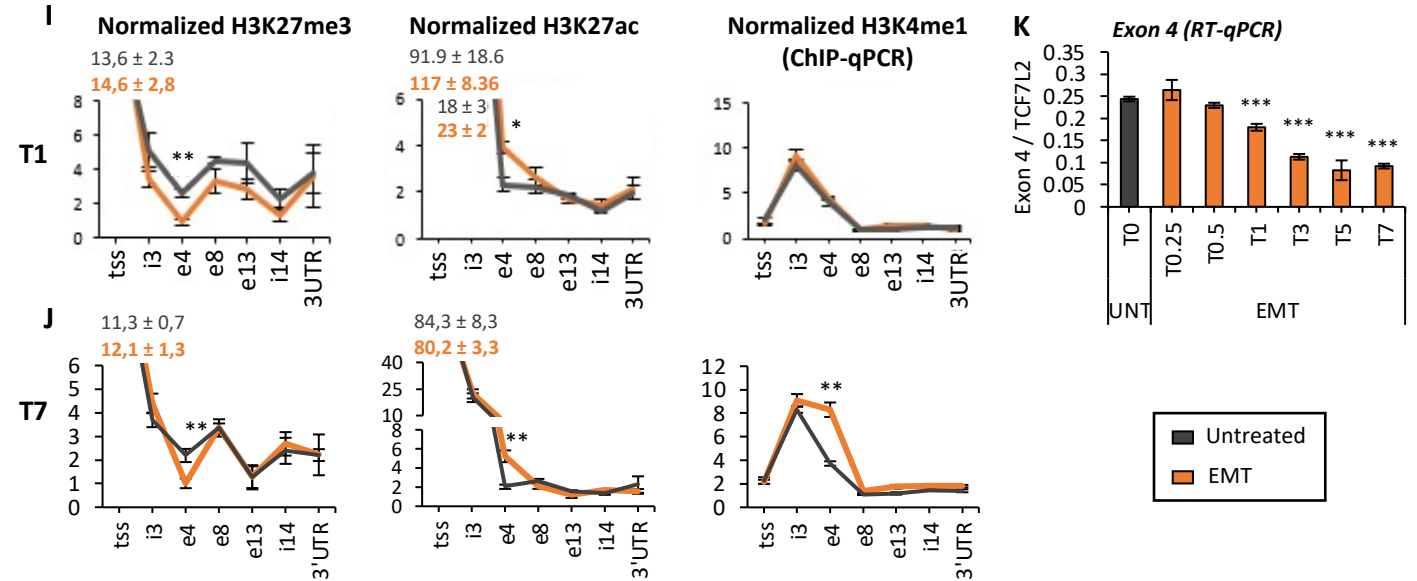

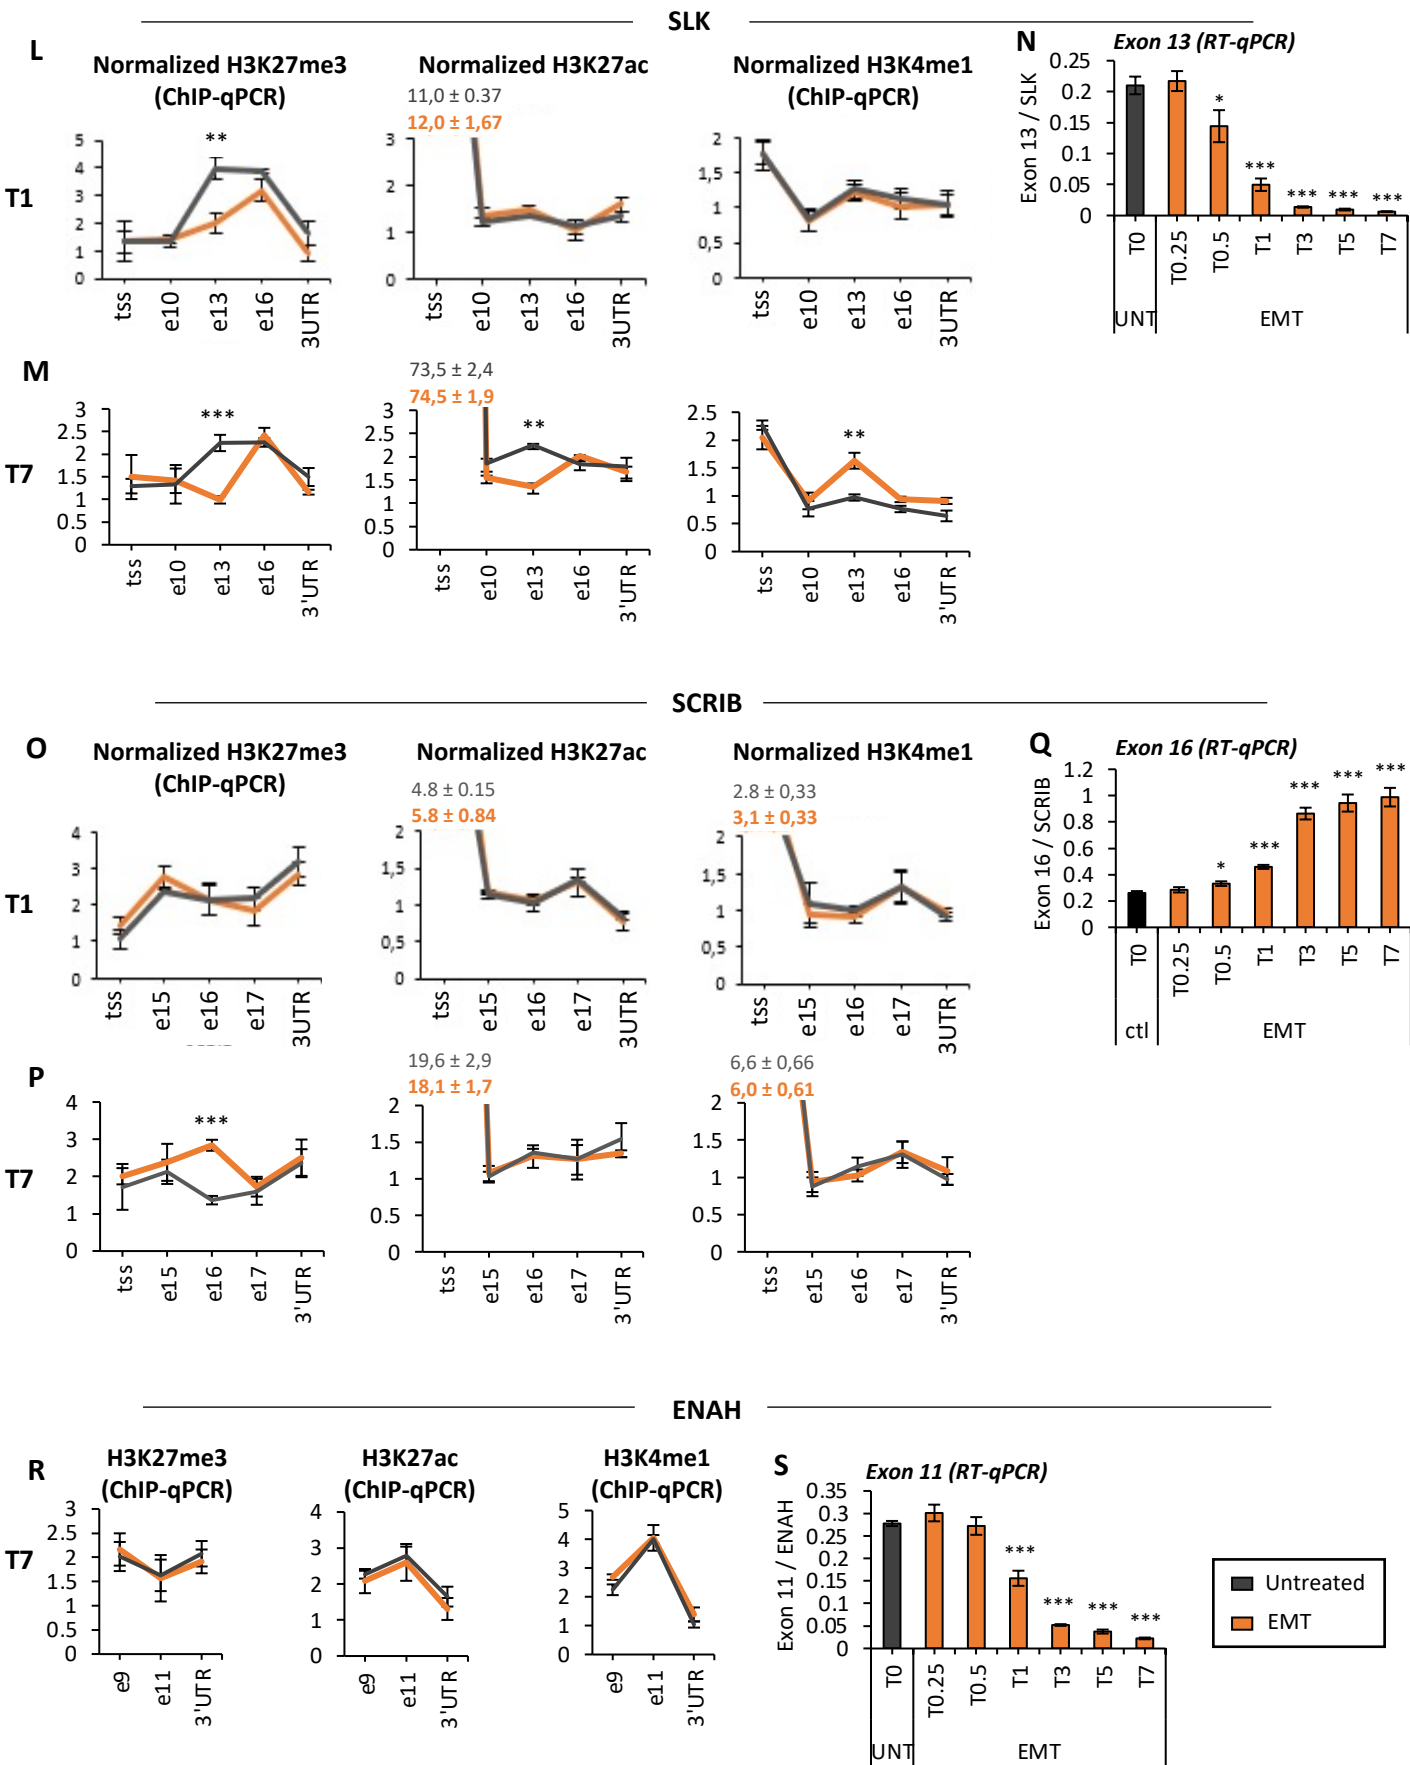

**Supplementary Figure 1: Localised enrichment of specific histone marks at alternatively spliced exons during EMT.** (A,B) CTNND1 expression and exon 20 inclusion levels relative to total TBP and CTNND1, respectively, during EMT and MET in induced MCF10a-Snail-ER cells by RT-qPCR (mean +/- SEM, n=4). (C,D) Enrichment levels of H3 and H3K36me3 along CTNND1 locus in tamoxifen-induced MCF10a-Snail-ER cells for 24h by CHIP-qPCR (mean +/- SEM, n=4). Only for H3K36me3, the percentage of input was normalized by two control regions across the different conditions. (E,F) FGFR2 expression and exon IIIb inclusion levels relative to total TBP and FGFR2, respectively, during EMT and MET in induced MCF10a-Snail-ER cells by RT-qPCR (mean +/- SEM, n=4). (G,H) Enrichment levels of total H3 and H3K36me3 along FGFR2 locus in tamoxifen-induced MCF10a-Snail-ER cells for 24h by CHIP-qPCR (mean +/- SEM, n=4). Only for H3K36me3, the percentage of input was normalized by two control regions across the different conditions (I,J,L,M,O,P,R) Enrichment levels of H3K27me3, H3K27ac and H3K4me1 along TCF7L2 (I-J), SLK (L-M), SCRIB (O-P) and ENAH (R) loci in tamoxifen-induced MCF10a-Snail-ER cells for 1 (T1) or 7 (T7) days by CHIP-qPCR (mean +/- SEM, n=4). The percentage of input was normalized by two control regions across the different conditions. (K,N,Q,S) Inclusion levels of alternatively spliced exons essential for EMT: TCF7L2 exon 4 (K), SLK exon 13 (N), SCRIB exon 16 (Q) and ENAH exon 11 (S) in MCF10a-Snail-ER during induction of EMT and reversible MET. RT-qPCR values were normalized by total expression levels of SLK, TCF7L2, SCRIB and ENAH, respectively (mean +/- SEM, n=4). \*P <0.05, \*\*P <0.01, \*\*\*P <0.001 in two-tail paired Student's t-test respect untreated (grey).

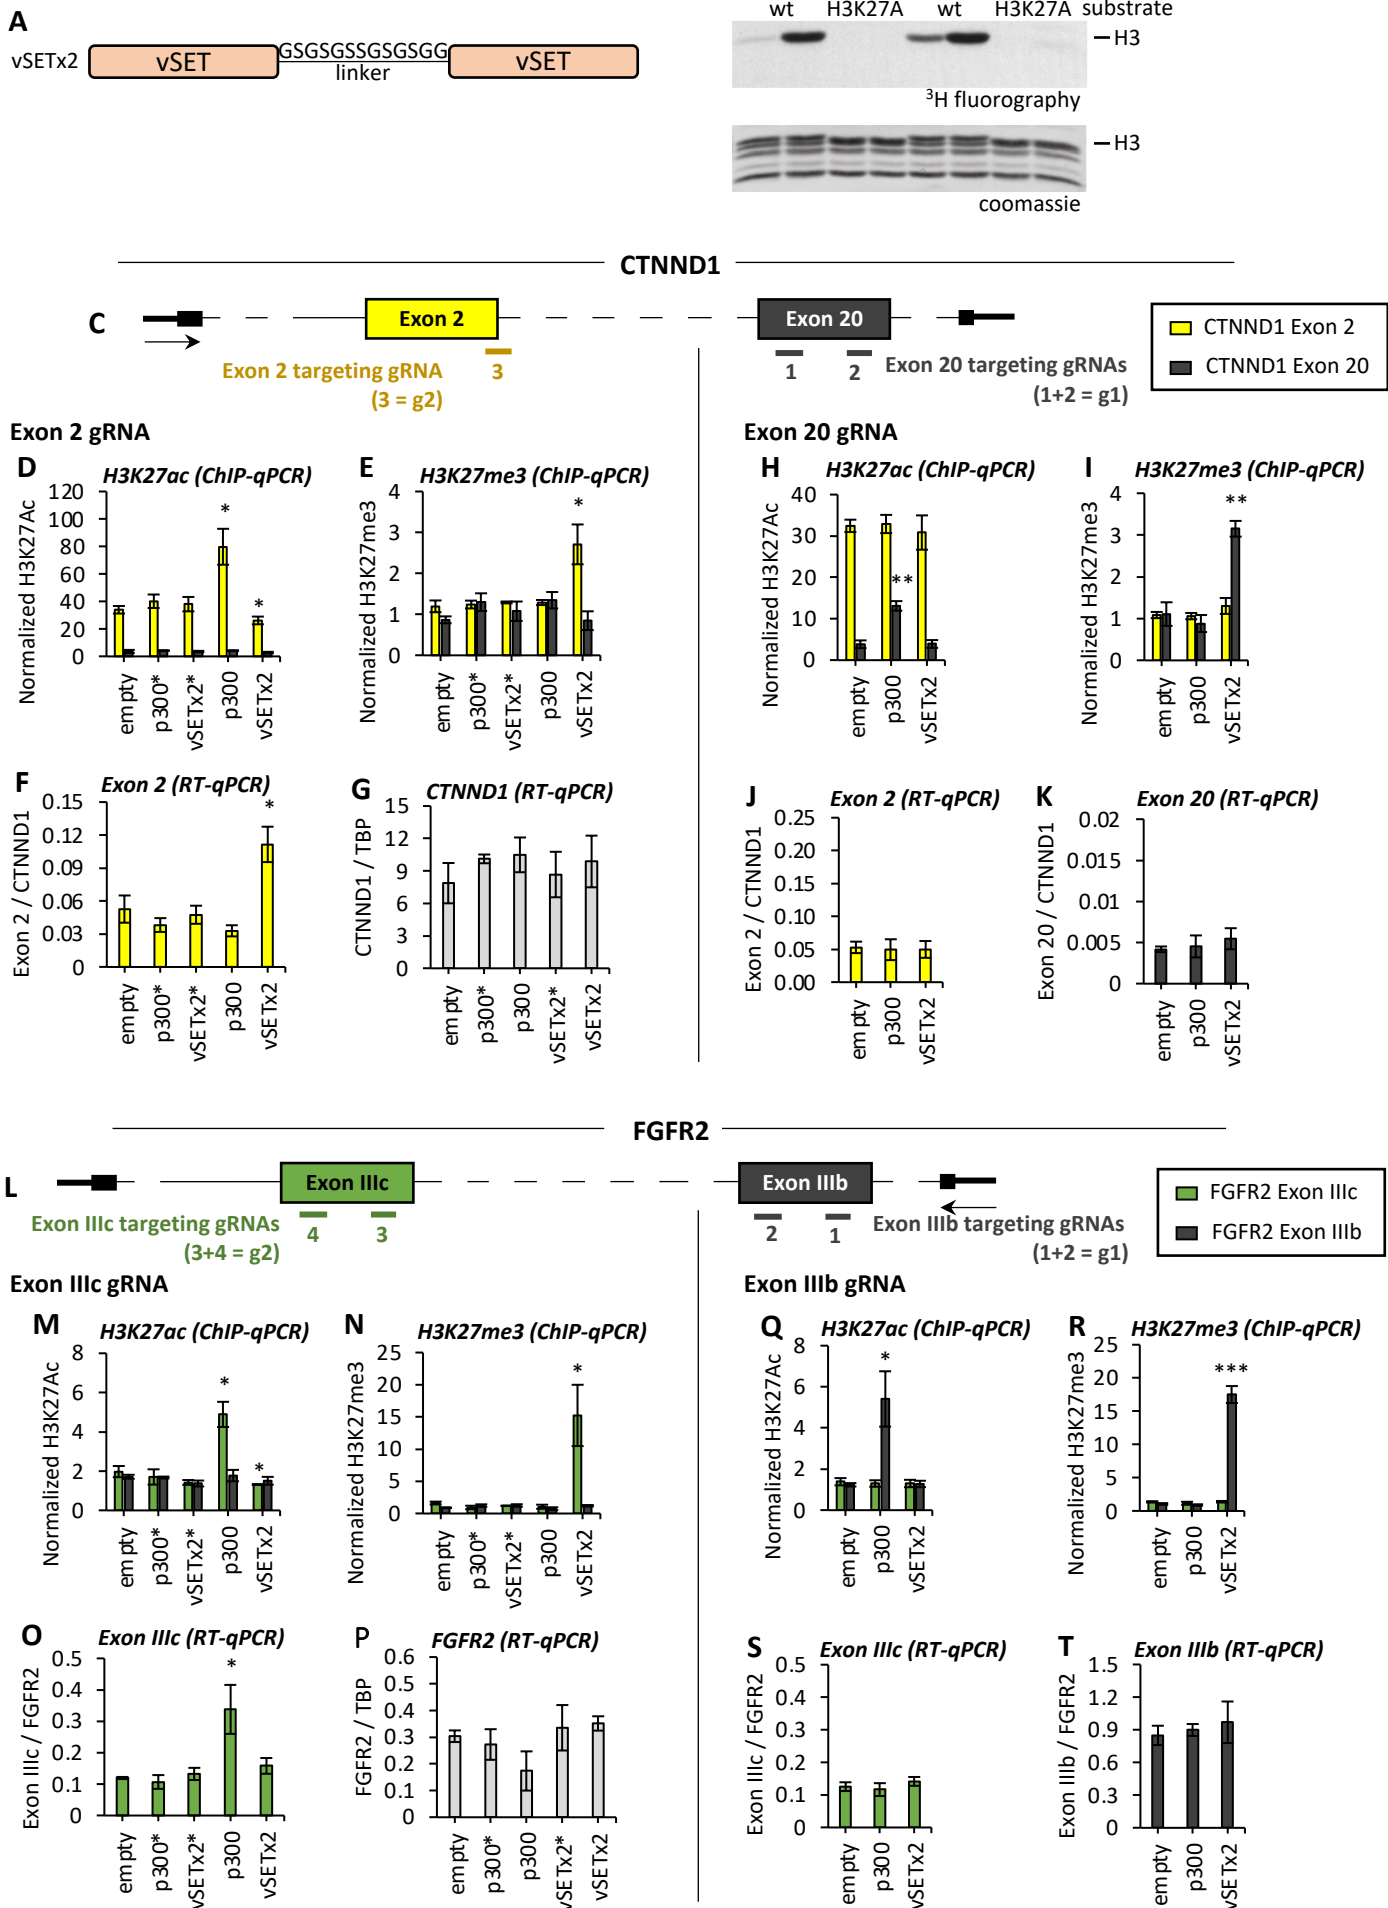

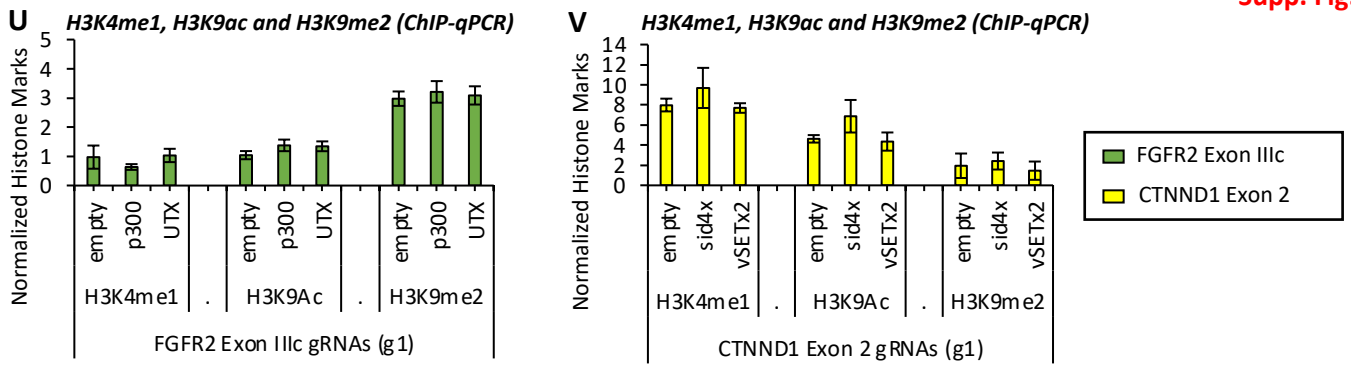

**Supplementary Figure 2: Exon-specific epigenome editing of H3K27 marks is sufficient to induce a change in splicing.** (A) Schematic of vSETx2 construct with optimal linker sequence between the two monomers. (B) Representative histone methyltransferase assay to show the specificity of native vSET and vSET2x activity on H3K27 residue in wild-type and H3K27A mutated recombinant chromatin templates. (C) Schematic representation of CTNND1 gene locus and the alternatively spliced exons 2 (yellow) and control exon 20 (grey) with the position of the gRNAs used to exon-specifically target the different dCas9-fused proteins. (D,E,H,I) Enrichment levels of H3K27ac (D,H) and H3K27me3 (E,I) at CTNND1 exon 2 (yellow) and control exon 20 (grey) in MCF10a-Snail-ER cells infected with dCas9-fused proteins and two different combination of exon-specific gRNAs targeting exon 2 (g2) or exon 20 (g1) (mean +/- SEM, n=3). The percentage of input was normalized by two control regions across the different conditions. (F,G,J,K) Expression levels of CTNND1 exon 2 (F,J), total CTNND1 (G) and exon 20 (K) in untreated MCF10a-Snail-ER cells infected with dCas9-fused proteins and the exon-specific gRNAs targeting exon 2 (g2) or exon 20 (g1). RT-qPCR values were normalized by total CTNND1 or TBP as indicated in the graph (mean +/- SEM, n=4). (L-T) Same as (C-K) on FGFR2 gene locus, with (L) a schematic representation of FGFR2 locus, with gRNAs position at the alternatively spliced exon IIIc (green) and control IIIb (grey). (N-T) H3K27ac, H3K27me3 and expression levels as represented in (D-K) (mean +/- SEM, n=4). (U,V) Enrichment levels of H3K4me1, H3K9ac and H3K9me2 at FGFR2 exon IIIc (U, green) or CTNND1 exon 2 (V, yellow) in untreated MCF10a-Snail-ER cells infected with dCas9-fused proteins and exon-specific gRNAs targeting exon IIIc (g1,U) or exon 2 (g1,V) by ChIP-qPCR (mean +/- SEM, n=3). The percentage of input was normalized by two control regions across the different conditions. \*P < 0.05, \*\*P < 0.01, \*\*\*P < 0.001 in two-tail paired Student's t-test compared to empty-dCas9.

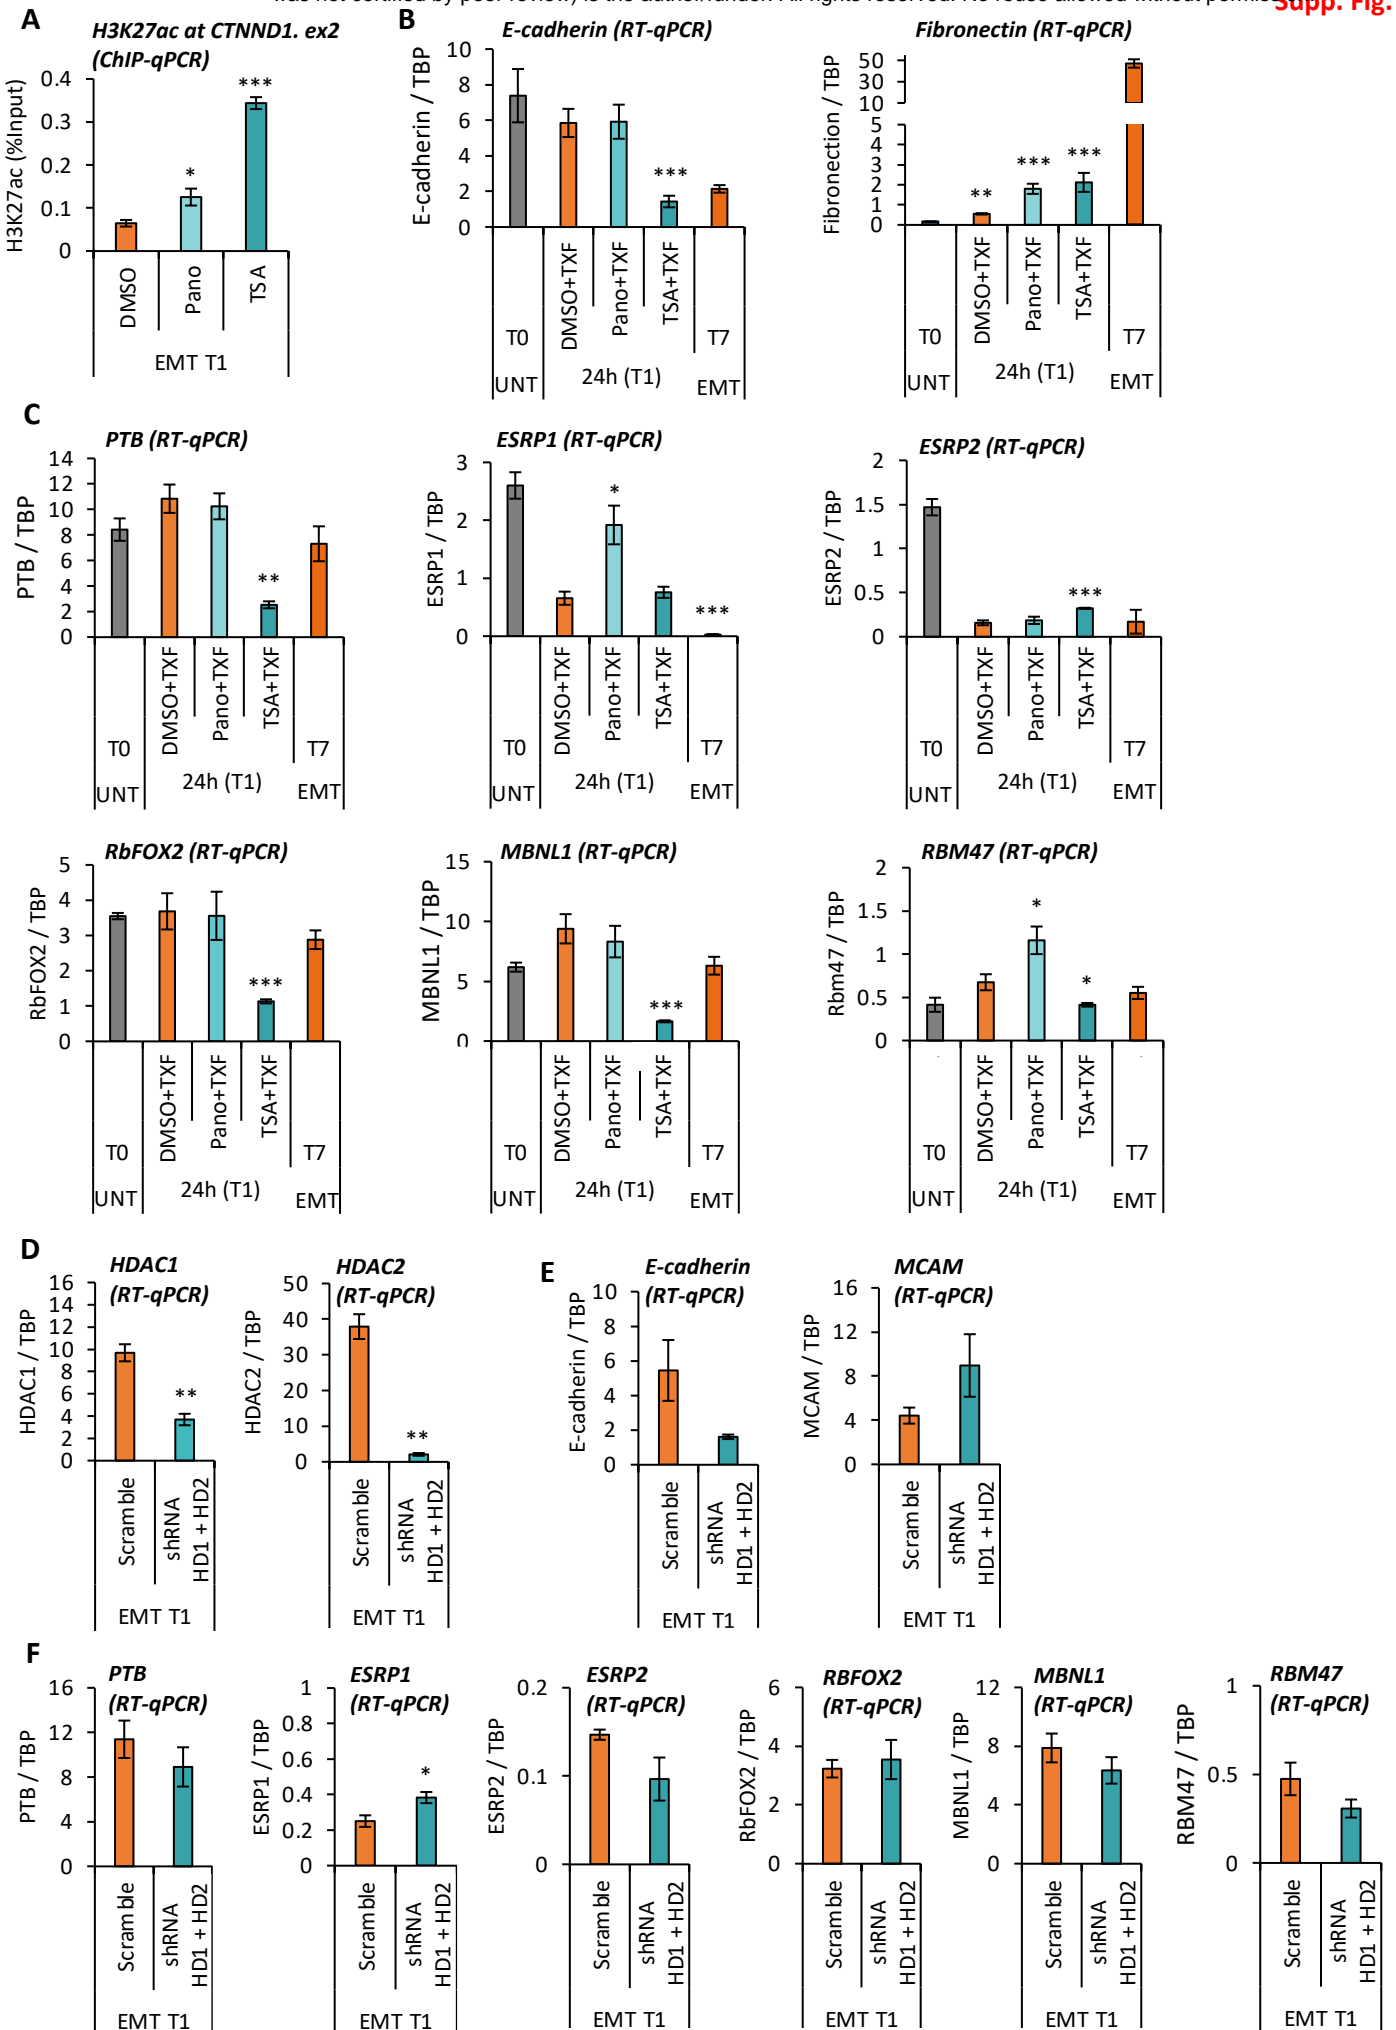

**Supplementary Figure 3: Impact of HDAC inhibition in H3K27 marks and major splicing regulators. (A)** Enrichment levels of H3K27ac at CTNND1 exon 2 in MCF10a-Snail-ER cells treated for 24h with vehicle DMSO, 10nM of Pano (Panobinostat) or 1 $\mu$ g/mL of TSA (Trichostatin A) during EMT induction with tamoxifen. CHIP-qPCR data is shown as the percentage of input (mean +/- SEM, n=3). **(B-C)** Expression levels of epithelial (E-cadherin) and mesenchymal (Fibronectin) markers (B) and key EMT splicing factors (C) in MCF10a-Snail-ER cells treated for 24h with vehicle DMSO, 10nM of Pano (Panobinostat) or 1 $\mu$ g/mL of TSA (Trichostatin A) during EMT induction with tamoxifen. Untreated (T0) and fully induced EMT cell (T7) are shown as control references. RT-qPCR data was normalized by TBP (mean +/- SEM, n=3). **(D, E, F)** Expression levels of HDAC1, HDAC2 (D), EMT markers (E) and splicing factors (F) upon double knock-down of HDAC1 (HD1) and HDAC2 (HD2) in MCF10a-Snail-ER cells induced for EMT during 24h. Non-targeting scramble shRNA was used as a control. RT-qPCR data was normalized by TBP (mean +/- SEM, n=3). \*P <0.05, \*\*P <0.01, \*\*\*P <0.001 in two-tail paired Student's t-test respect T1 DMSO for (A-D) and T1 Scramble for (E-G).



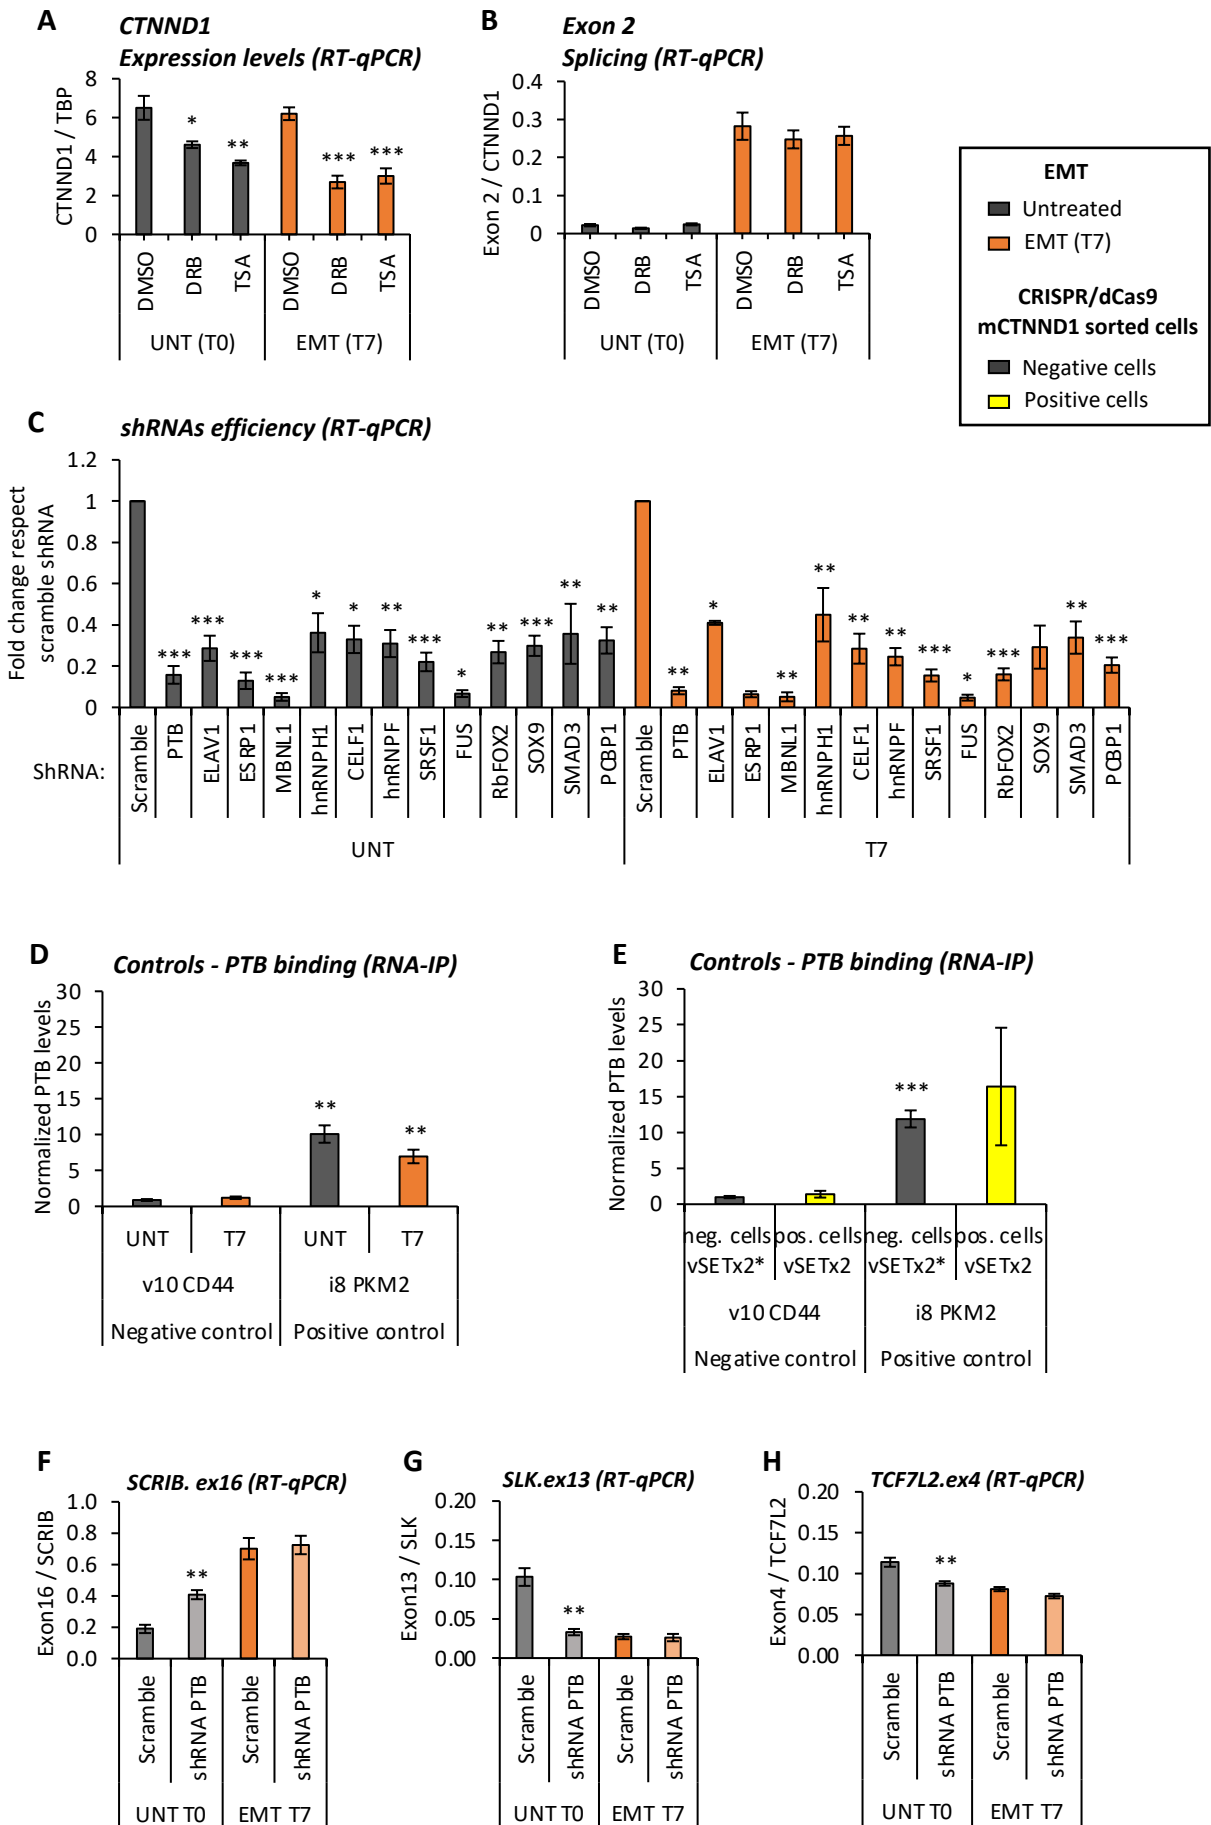

**Supplementary Figure 4. H3K27 marks regulate splicing by modulating the recruitment of RNA-binding proteins, such as PTB. (A,B)** CTNND1 expression and exon 2 inclusion levels normalized by total TBP or CTNND1 expression levels, respectively, in untreated epithelial (UNT, grey) and mesenchymal-like (EMT T7, orange) MCF10a-Snail-ER cells treated with DMSO (control), 1  $\mu\text{g}/\text{mL}$  TSA (HDAC inhibitor) or 40 $\mu\text{M}$  DRB (RNA Polymerase II inhibitor) for 24h. RT-qPCR results are shown as the mean  $\pm$  SEM of  $n=4$  biological replicates. **(C)** Total expression levels of the candidate splicing factors involved in CTNND1 exon 2 regulation upon shRNA knockdown in untreated (UNT, grey) and tamoxifen-induced (T7, orange) MCF10a-Snail-ER cells. RT-qPCR levels are shown relative to cells infected with scramble shRNA (mean  $\pm$  SEM,  $n=3$ ). **(D)** PTB enrichment levels at the the negative control CD44 v10 and positive control PKM2 intron 8 in untreated (UNT) and tamoxifen-induced (T7) MCF10a-Snail-ER cells. The percentage of input of UV-crosslinking RNA immunoprecipitations were normalized by IgG and CTNND1 exon 7 control levels as in Figure 4 (mean  $\pm$  SEM,  $n=5$ ). **(E)** PTB enrichment levels at the same positive and negative control regions as in (D) in cell-sorted MCF10-Snail-ER cells expressing (positive) or not (negative) the mesenchymal-specific splicing isoform mCTNND1(ex2) upon infection with dCas9-vSETx2, or mutant dCas9-vSETx2\*, and the exon-specific gRNAs (g1) targeting CTNND1 exon 2. The percentage of input of UV-crosslinking RNA immunoprecipitations were normalized by IgG and CTNND1 exon 7 control levels (mean  $\pm$  SEM,  $n=4$ ). . \* $P < 0.05$ , \*\* $P < 0.01$  in two-tail paired Student's t-test respect the negative control CD44 v10. **(F-H)** Inclusion levels of the indicated exons relative to the total expression levels of their corresponding gene upon shRNA knock-down of PTB in epithelial untreated (UNT T0, grey) and tamoxifen-induced (EMT T7, orange) MCF10a-Snail-ER cells. Non-targeting shRNA is used as a control (Scramble)(mean  $\pm$  SEM,  $n=4$ ). \* $P < 0.05$ , \*\* $P < 0.01$ , \*\*\* $P < 0.001$  in two-tail paired Student's t-test respect cells infected with scramble shRNA.

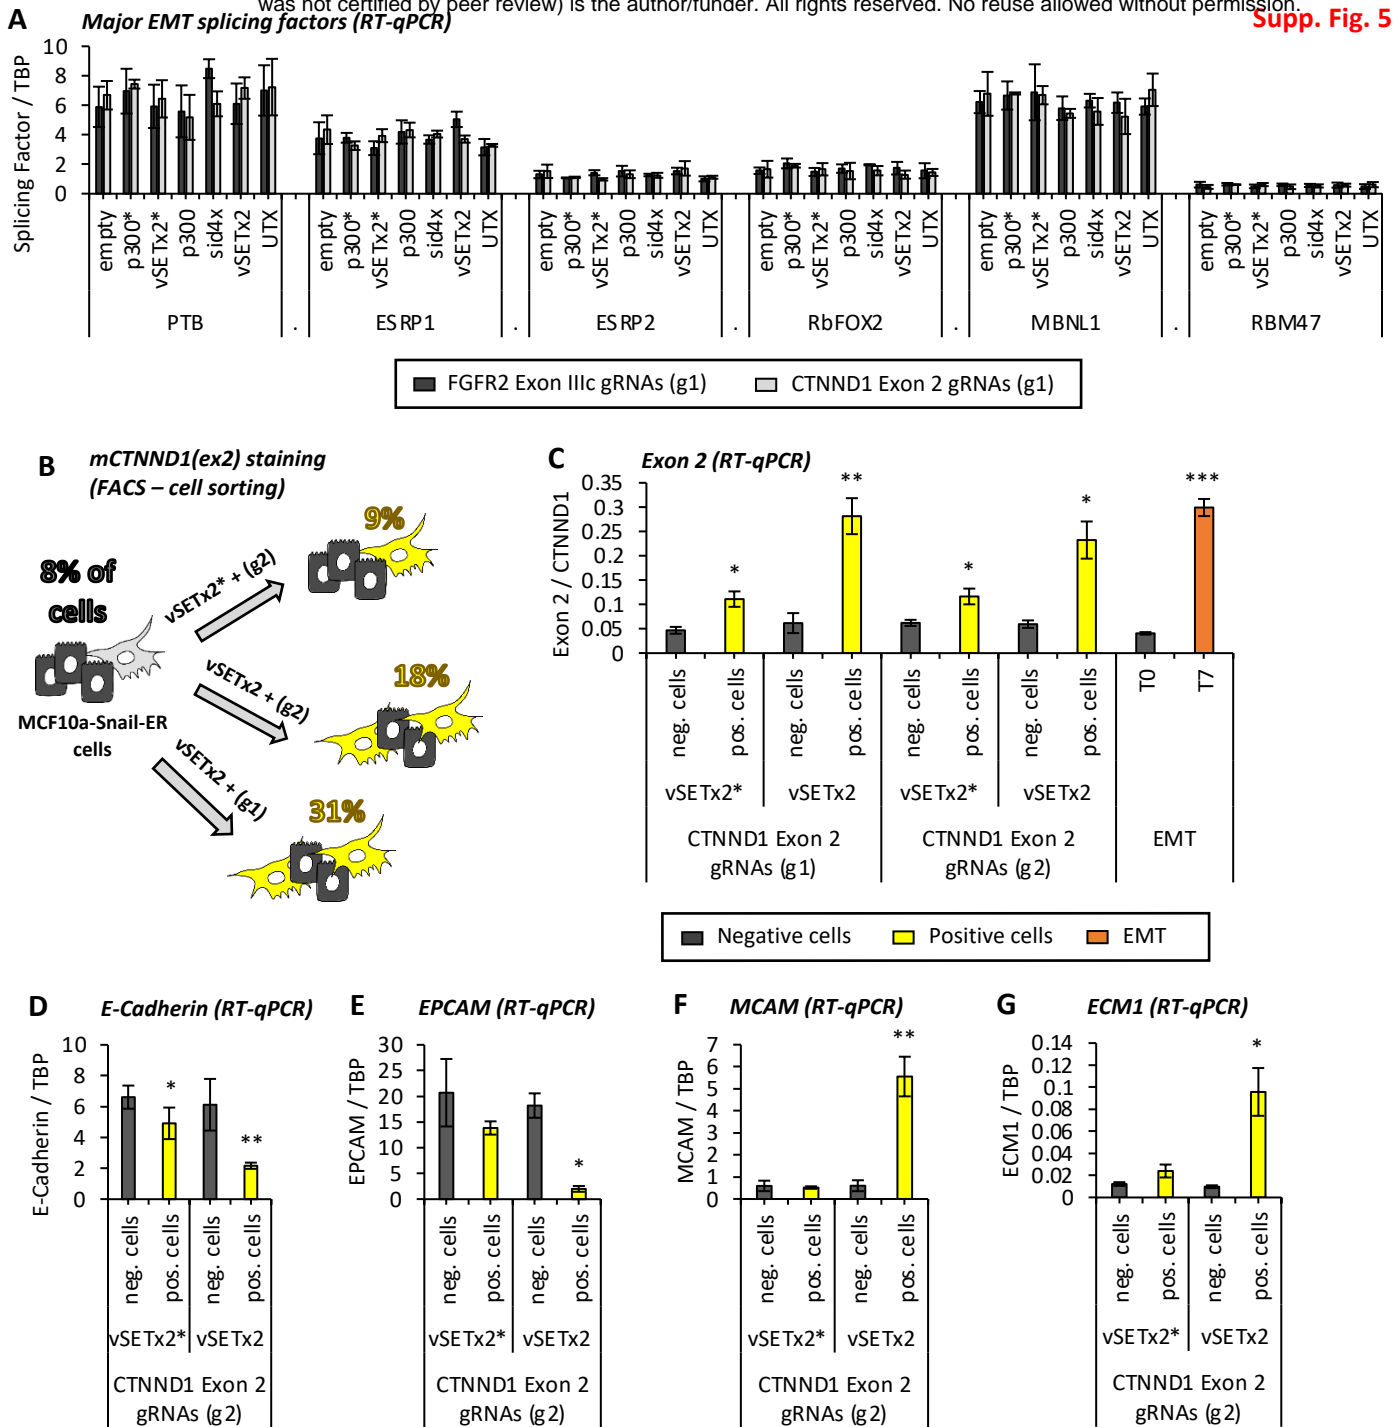

**Supplementary Figure 5: Direct effect of dCas9 epigenomic editing on EMT.** (A) Expression levels of the splicing factors most important for EMT (PTB, ESRP1, ESRP2, RbFOX2, MBNL1 and RBM47) in MCF10a-Snail-ER cells infected with different dCas9-fused proteins and exon-specific gRNAs targeting FGFR2 exon IIIc (g1, dark grey) or CTNND1 exon 2 (g1, light grey). RT-qPCR levels were normalized by TBP (mean +/- SEM, n=3). (B) MCF10a-Snail-ER cells infected with dCas9-vSETx2 or mutant dCas9-vSETx2\* and two different combinations of exon-specific gRNAs (g1 and g2) targeting CTNND1 exon 2 were cell-sorted by expression levels of the mesenchymal CTNND1 protein variant, which includes exon 2 (mCTNND1(ex2)), using splicing-specific antibodies. Negative cells not expressing mCTNND1(ex2) and tamoxifen-induced T7 EMT cells were used as controls. The percentage of mCTNND1(ex2) positive cells per condition is shown. (C) CTNND1 exon 2 inclusion levels in cells expressing (positive) or not (negative) the splicing variant mCTNND1(ex2) in the conditions described in (B). RT-qPCR levels were normalized by total CTNND1 expression levels (mean +/- SEM, n=3). (D-G) Expression levels of epithelial (E-Cadherin, EPCAM) and mesenchymal (MCAM, ECM1) markers in cell-sorted MCF10a-Snail-ER cells infected with dCas9-vSETx2 or the mutant dCas9-vSETx2\* and the second combination (g2) of gRNAs targeting CTNND1 exon2. RT-qPCR levels were normalized by TBP expression levels (mean +/- SEM, n=3). \*P < 0.05, \*\*P < 0.01, \*\*\*P < 0.001 in two-tail paired Student's t-test respect negative cells.
